# Supplementary material for: Genome-Wide Mapping of Virulence in Brown Planthopper Identifies Loci That Break Down Host Plant Resistance
Source: PLoS One. 2014 Jun 9;9(6):e98911. doi: 10.1371/journal.pone.0098911 (PMC4049697; doi:10.1371/journal.pone.0098911)
Supplement: Table S1 — List of 833 new EST-SSR markers developed in this work. (XLSX) [file pone.0098911.s001.xlsx]

## Sheet: Sheet1
Table S1. List of 833 new EST-SSR markers developed in this work.
Marker name	Forward primer (5' to 3')	Reverse primer (5' to 3')	Expected Product Size (bp)	Reapt Motif
BM503	CTTGTTTCCTATTGGAGGATT	TGGTGGTGTTATTTGTAATCTG	159	(TAA)7
BM504	TGGATCTATAATGGGAATGG	ACGGTGGTGACTGCTCAT	156	(TGC)6
BM505	AGAGGAGAAATGGAGAAGAAA	CACCGGTTGAGTAAGTCAGTA	158	(CAG)9
BM506	ACTATAGCAATGGAGGTGTGA	AACACTTTCTTGTTCTCCAACT	145	(AGG)7
BM507	ATAGGAATGAAGGAGATTTGG	CTCATCTCAATCTTCAACCAC	145	(GAG)11
BM508	TTTCCATCTCAATCTCTTCAA	GGAGGAGGAAGAATAAGAATG	156	(TCT)6
BM509	GTCACTAAAAGGAGACAGCAA	GCCAAACCAACTATCAGGTAT	142	(CAG)4
BM510	ATCCTAAGTAGTGCATGATCG	CAGCAGAAGGAAAAATCAAC	149	(TGA)7
BM511	AGTGCTGATCCAGCATTATC	CTGGGTAAACACTATCAGAGC	168	(GGA)4
BM512	GGAAGTGTTCGTCTATCACAG	CCTCCTACTCACAAACCATTT	147	(TGG)4
BM513	GATACAAATCGGTTGACAGAA	CCTCATCTACTTTTCCTTTCAC	145	(GAA)6
BM514	AAGGAGGAGTAGAAGCTGAAA	TTGACACTTTTGTCCATTTCT	150	(GAA)4
BM515	TATATTCGGTGAAAGAGGACA	GATGTTTCAACAGAAGATTCG	162	(CTT)5
BM516	ATGATGATGGTGATGATGATT	GCGTAGGTACTGCTCTGATAA	147	(ACCTC)4
BM517	GAAAGAATGTGCCAAAGAATA	GTTCTGCAAACTCAACCTTC	150	(AGC)6
BM518	GTACTTTCTTGCCGGTTGTA	AGGTTCGAGTGACGTTCTT	154	(TGG)6
BM519	GGATAGGATTTCCAAAGAACA	GTTGGAGAATTTTGATGTGTC	156	(CT)7
BM520	CACTATGAGGAGGATGTGTTC	TGCTACTCAGAGATGGAATTG	151	(AAC)6
BM521	ACTGCAAGGATGAACTAGTGA	CTTTTCTTCGTTAGGACCAAT	150	(GAAA)3
BM522	GGTTCAAAACGGTGATATTTT	TGCCTTCTAGATCTGCTATTG	150	(AG)9
BM523	TCTCTCTTAATGTTCTTCACCA	GACATGGACACGAGCAAC	155	(TTC)7
BM524	TGTTCAGTACTTTCGGCTTC	ATGCGCAGTAACTATTCTTCA	177	(ACC)6
BM525	GGGTCTATTCTACTACGCTTTG	TGTTTTCAAGAAGAAGGACAA	153	(CCT)4
BM526	ATTTCCGTTTCACTTTCTTCT	ATCGAGTGTCAAGATGAGTTG	148	(CTC)6
BM527	GTAGCGAGCCTGATGAGC	AGCCAATGTATTGAGCTGTAG	192	(CCG)4
BM528	CGTTGAGTGAGGAGAAGAATA	TCCATCATGTTCTGTCTTGAT	154	(AAC)7
BM529	AAGTGGAGATACATCAACTGC	TCCATCAACACCACTTACTTC	154	(AGG)4
BM530	TTCGATGGTGTACAAAGTGA	TTCTCGTTCCACTTTTGAAT	173	(GAG)6
BM531	TTCTGCAAGTCACGTAGTACA	GTTAAGGAAGAGGAAGAGGTG	158	(CCT)4
BM532	ATCATCATCATCATTGTCCAC	GAGGAGATGGATCGTAAGGT	153	(CCT)5
BM533	CCTCTTCTTCTACCTCAAAGC	GAGAGAGAGGGAGAAAGAGAA	140	(CTC)4
BM534	AAGTATGCATGCGTTAGTAGC	AAATTGCAGCAGCTTTTCT	145	(CGGCGT)3
BM535	GTGCTTGCTAAACTTTTCATAA	GACTTCGTGCGAAACTTTAC	168	(TAC)6
BM536	AGGGTTCTAAAGTTGGAAATG	TCATCAGTTTCTTCGTCACTT	151	(GAA)6
BM537	AAGAAGAAGAAGAACGACGAC	TTCTTCTGTCTCTCGAAATTG	140	(ACA)6
BM538	ATACAAGGGAGAAGAGTACGG	CACCTTGATCCAGTTCATAAG	155	(TCCAG)3
BM539	AGCTGTCAACCAACAAGATTA	GCAACCTAGATGAACACAGAC	147	(ACC)6
BM540	CCGAGAGAGGAGTTGTTACAT	AAACTTCCGTTGTATTTTTCC	141	(AAG)6
BM541	TCACTTGTTTCAATTCTTTCAG	ACATTCTCCATCAAGGTTTTT	149	(TG)10
BM542	CGTTGGTTGATTATTAAGTGC	TCAGTGTACCTGATTTGAAGC	149	(GAT)6
BM543	CTCCTCCTCTTCCTTCTTGT	ATGGAGATGGAGATGAAGAAT	178	(TCT)9
BM544	GAAGGAGAAGAAGAGGAAGAA	TCTCCGAGCTAGATAAAAGTG	146	(GAA)8
BM545	TCTTAAGCTTGATTGTTGGTG	AGTCGAGTGAGATGAGAACG	153	(CTG)9
BM546	AAGAAAAGAGTGCGTTTGAC	AGCCTACGATGATGATGACT	147	(TGA)7
BM547	CTCAACCAACCTACTCACAAA	CATGTTGTAGTGTTGTTGCTG	155	(CAA)10
BM548	AACAGCAACAACACTACAACA	TGTCATCACTGTCCTCACTG	174	(GGA)4
BM549	AACACTCAACAGACACCTCAG	ATGATGTGAACACGTCTCTGT	179	(CAG)4
BM550	TCTTTTCCACTCAGAATCTCTC	GGAGGAAGAAGAAGAAGAAGA	153	(TCC)5
BM551	TCTTTTTCGTTGTCATCTTGT	AAGGTGAAGAAGAAGGAGAAG	192	(TTC)10
BM552	CTTCCTCCTTTTCTTCTTCTT	AATGTAGATAAGTGGGATGAGG	141	(CTT)5
BM553	CATTCTCCTCCTCCAACTACT	ACTGGAAGATAGGAAGGAAAG	151	(TCT)4
BM554	AACAAGGTGCTGGACAAG	CCTCCTTCTTTGTCTTTGTCT	201	(GCA)7
BM555	AAACGACACAAGATGCAGT	TACATCATGTGGTGATGAGG	162	(GCA)4
BM556	CTTGTCTCTCTCACTCCCTCT	AAGTACAAATTCTGCCTCCTC	150	(GAG)7
BM557	AAACGGAGAGCATAAAGAACT	ATCATCATCATCATTTGCTTC	157	(GAA)4
BM558	AACTGGAAGAGAGAGACGAAG	AAATGATGAGACAACGAACAC	149	(CAT)5
BM559	TCACCTTCTACTTCTCCATCA	CCAGATTCTTCTGGAGCTACT	148	(CCT)4
BM560	TTCTATGCCCAAGACATCTAA	CCAGGAACATCAAAAATAACA	144	(ATC)6
BM561	ATGCTGTTAACATCGCTACAT	CTGCTGCTGCTAAATTTGTAT	154	(TG)17
BM562	AAGAAAACACGCACATACAAT	TTTCACCATTTATGTATGCAG	153	(AGC)4
BM563	TAAGATTAGCCATTGACATGC	GTGCTCAATTTTCTATGCAAC	147	(ATC)4
BM564	ATCAAATACACTGCTTGCATC	TGAAAAATGCTTTCTAGTTGG	139	(CAA)4
BM565	CATCCATAGCCATTGACATTA	GCTTTGATAAAACTAGCTGGA	158	(TTC)5
BM566	GTGGCGACAAATCTAGTGATA	ATTATTGCATGTCAATGGCTA	137	(ATAC)3
BM567	CATCTTGTTCTCCTTCTCCTT	GCTTCATATTTTCACAATGCT	148	(TTC)6
BM568	AGAATATTCGCCTGATTCTTT	GATTCAAGTAGCAGCAGTGAC	143	(TCA)7
BM569	GAAGAAGAAGAAGAAGGCAAT	CCACTCTTCCTCATCATCAC	137	(GGA)5
BM570	TCCTTCATTTTTGTCTTGTTC	AAGGGGAGACTGAAAATTATG	140	(TTC)8
BM571	CTTTCATCAGCAACACTCTTC	CTTTGCACTGTCACTTTTCTC	133	(CTA)4
BM572	GAATAGGAGGAGGATGAGTTG	GCCTTCTTGTTTTTCTTCTTC	148	(AAG)7
BM573	TCATGTGAAATTCGTGTTGTA	AAGAAATGCTTGAAGGAAACT	125	(AATA)5
BM574	GTTGTGCCTTTCCTAATGTT	GCGGTATTGAATGTGACTTTA	169	(AATA)5
BM575	GCGAGGAGAGAGACGTATTAT	GGGGTAGAGGATAGTACAGGA	205	(CTC)5
BM576	ATATATTCTCGAGGGCTGGAT	GAATGAGGAGGAGGAGGA	104	(CCT)5
BM577	GTGAAAGTTGTCCAGAAGTTG	GTTCCATTGAGCATTTTACC	194	(CAG)6
BM578	GATAATCAGCAGCAGTCTGG	CTTGTTTTTCTGTTGGCTGT	150	(CAG)5
BM579	GCATCAGTATTCAAAGGATTG	CCGAATGTGTAATTGAAGAAG	176	(TCA)7
BM580	TTGTGTTAGGCGTCTAAGTGT	TTCGTACCGCCAAATAGTC	185	(TGAT)6
BM581	GGCATCATGAGCGAGATA	CAAGCATCCATTGATAAAAAC	109	(TGA)7
BM582	CTTTGGTCGATTTTTCATTAC	AGAAGTCTGAAGTCATGTCCA	153	(CAT)7
BM583	GTTCAAGTACGACCCAGAGTA	CATCTGAATCGTCATCGTCT	146	(TGA)6
BM584	AACAGATGAACTGAGAGAGCA	AGATGAAGAGGATGAGGAGTC	148	(TCA)4
BM585	CTCTTATTCTAGTGCCTCATCA	GGAAGAAGATGGAGAAGAAAG	183	(TC)11
BM586	AAAGCCACACATTATTACTGC	CAGTTCGATACATGGGAATAG	146	(TCA)7
BM587	GAACTGTTTCCACTGTCACAT	AACGTGGAGAAAGAAGAAGAT	146	(TTC)6
BM588	CACGTTTCGTTCAGTTTCTAC	AAACATTTTGAAACGTGGAG	168	(TTC)5
BM589	CCACGTTTCAAAATGTTTCTA	TGTGAAGGAAGAAGAGAATGA	151	(TCT)5
BM590	ATCCTTTCCTTTTCTCTACCA	CTGTTGAGGAAGAAGATGGAG	100	(TCT)4
BM591	AGAAGAAGACAGGAGTTGAAGA	CTGCGCTAATAAAAGTCATGT	154	(AGATT)3
BM592	CCCACTCAGATCAACAGAATA	CCAACTGTTAATCCTTCTCCT	148	(ATG)8
BM593	TGATGATGATGGTGATGATAA	TTTTCTTCGTTTCTACTCCAA	163	(GAA)6
BM594	TCTTCTCCTCCTTTTTGAAGT	ATTGAGAACGGTGTAAGACAA	157	(TCT)5
BM595	TTTTCTCCTTCTTCATCATCA	AGCAGCAAGTAGGAATAGGAT	131	(CTT)4
BM596	GAGTCCTAACTCCACCCTATT	ATGATGATGTTGGTAAAGTGG	147	(AATC)4
BM597	CGGACATGTCTGGTACACTAT	ATTCTTGCTTTTGACACACAT	170	(TCA)7
BM598	ACCTGCCCTACACACCTAC	AGAGCTCCTTCAGAATTTCAT	138	(ACC)9
BM599	CTGAATGACATCCTTCACTCT	CAAGTGAGATGGTGCTGTTAT	149	(AGG)5
BM600	CCTGTTGGTAATGATACCTGA	AAGCATAAACCTAGCGAGTCT	149	(CAT)11
BM601	ATGAGTAGCAATCAGCCTACA	CTATGATCAGAAGCAGGAAGA	153	(ATTT)3
BM602	GTCAGAGTCGGCTTGGTC	TTCCTCGAACATAATTCAATC	159	(TGC)6
BM603	TGTTTGTGCATCTCTCTTTTT	GAAGCGTGAGAGAGTAACAGA	150	(CACT)3
BM604	CACTCACTCTAACACCCTCAC	GAGAGACAGAGTGAGAACGTG	155	(CACT)4
BM605	AGAAACAGATCTTCCAAGGAG	CCTCCAGTACTCCTCCTCTT	135	(AGG)6
BM606	GAGTCCAGAGGAGATGTCAA	ACCAGGGCAGTCTCAATATAC	153	(GGA)4
BM607	CTTCTCTTCTGCTTCATCCTT	TAAAAGAGCATTTCGATGGTA	155	(ACT)4
BM608	TTATTCTCTGGTTCGTTGAAA	TGAAGATGGTTTCTGATAGGA	160	(TCA)7
BM609	TTGTAAATGTTGCAGATGTTG	TCAACGTTTACTTGTTGGTTT	145	(GAT)6
BM610	TAGGGACACATTTCTGACAGT	TCGTGAAGAGAATAATGAGTGA	151	(CAT)4
BM611	CAATGCAGTGCTTGGTAGTAT	GAGGAGGATGAAGAAGATGAG	134	(CTT)7
BM612	TTCTTCTTCTTCTTCCTCCTC	TTCATGTTATTAGCACCACCT	144	(TCC)6
BM613	ATGCTCTGGTCTAAATGTGAG	TGTGACGTCATCAAGAGAGAT	138	(TTC)4
BM614	GGAGTGGATTCACTACTAGCC	AATCTGAGTGAAACGGAAGTT	134	(CCT)7
BM615	CAATCGACATGTTAAGGTTGT	TCAAGAAGGAGATGAGAATGA	143	(TCT)4
BM616	GCACTCTTACACCTCAACATC	GCGTTTTCAGATTCTTCACTA	158	(ATC)8
BM617	TTTATCTTCAATGGTTTCAGC	AGTTCGAGAACCACGTCTACT	151	(GGA)5
BM618	CAACTACTCCCTCATCTTTCA	TTATAGACAACCAGCGTATGG	114	(CACT)3
BM619	TCAAGTCGTCCAGAAAGAATA	ATCCTATTCCCAAGTAACGAA	147	(GTT)6
BM620	CTCAGCAAGTTCCTATGTCAC	ATCCTCATGACTTTGTTGATG	146	(TCA)4
BM621	ATCATCGTCTTCACATTCCTA	GAAATAAGACGTCGTTGACTG	139	(CAT)4
BM622	ACCCTTAATTCAGTTTCCTTT	CCGGTTAAATACCTTATCCAA	143	(TAT)6
BM623	TCGAGCAGATTATGCTACCTA	ACTACGCCAACAATAGCACT	180	(TTG)6
BM624	CATTGTTGTTGTTGTTGTTGA	CATCATGCAGTATCTCAGTCA	158	(CTG)4
BM625	CCATCTGAACTCGACAAGTAT	AAGAAATGAATTGATCCGACT	139	(TCC)6
BM626	CGTATTACCCAATGTCATTTC	CAAGGGTTTAATGCTTGTTAT	154	(TGAA)5
BM627	TGAAGGAATGAAAGCTATGAG	CGCCAAACTAGAAATAAGTGA	150	(AG)9
BM628	CTCCTCTTCGGTTTCTGATT	GAACTAAGTGAGCCTGAAGAA	150	(TCT)4
BM629	ATCATCCAGTGTTTGTTTCAC	GTTCCTCCCTCTTTTACAGAA	153	(TCT)4
BM630	ATCGTCCTTGCTATCCTTATC	ATGGTCATGATGTTGGAAGTA	161	(TCA)9
BM631	ATGTCATTGAAAAGCGAACT	CAATTCTGGTCGACTCTTACA	156	(GA)6
BM632	GTAGTGGAGGCTAACAAGGAT	CCTCTTCTCTTCGACTACCTT	141	(GGA)4
BM633	GAGGAAGAGGAGGAGTGTGT	CAAGGGTCTCTTGTCACTGT	150	(GAT)4
BM634	GAACCAGTTGTTGTCACGTC	CCGAAGATAAAACCAAAGAGT	147	(GTT)6
BM635	GAGATGATAACCAACACGAAG	GAATCATCCTCTTCATCGTC	157	(GAT)4
BM636	CCTTGAGCTGTGATTCTACAC	TAGAATATTCAACCGGCTTCT	162	(TAT)7
BM637	GGATGATTCAAACAGACATTG	GAAAATTCAAGTGACTCCAAA	135	(ATC)4
BM638	TTTTACGTTTGGCTACTTTTG	ATTTGTTGGATGAAGATGATG	165	(CAT)7
BM639	TCTTCTTCTTCTTCTTCTACTTC	AATAAGAGGAAGGAATCCACA	142	(TTC)4
BM640	CGACACTTATTTTCCCTTCTT	AAATGTGGAGATCTGTTACGA	150	(TTC)5
BM641	GTGTGCTGCTTGTAGAGATTC	CGATTGATCGACTTCTCTCT	161	(GT)12
BM642	TGACGAGCTACTAGTGGAAGA	ACTTCATCAGCTGAAAAACAG	154	(CTC)6
BM643	TCACCCTCTCCTTCTTCTTAT	ATCTCCTCTGTCTTGTCAATG	156	(CTT)5
BM644	ATTCTCAGCCAAGAAAAGAGT	AAGAAGAAGCGAAGAAAGAAG	151	(TTC)5
BM645	ATTTATTCGAGCCCTGTTTTA	CAGCGAGTAAAGAATTCAACT	150	(ATC)6
BM646	TTCTTCTTTTCCTGTTGTTTG	GTTCGGATGTCACTACTTGAG	164	(CTT)12
BM647	GTGTCACTTCCTTGATTTGAG	AATACGAAGGAAGGATGTAGG	181	(TGA)7
BM648	GGCACAAACTCAGTGGTACT	GACATAGCAGACCATCAACAT	143	(TCA)6
BM649	GACTTCCATGTTCCGACTATT	AATAAGAGGGAAAGATCAGGA	150	(CT)9
BM650	CCAACTACAGAGACCTCAAAA	CGTTCGGATGAGTACTGTAAC	149	(AG)13
BM651	ACAACAACAGTGACCAACAAC	AGCTTTACGAATTGTCTTGC	151	(ACC)4
BM652	ATGGAGAAGGCTCTTTAATTG	CAGTTCTCCATCATCATCATC	167	(GAT)6
BM653	GAGGATGTTGATGCAAAACT	TCTTCTTCTTCGTCTTCATTG	155	(ATG)5
BM654	ACAGTGCTTTCAGACAAAGTC	GTTTCAGCTCCACCTTGAC	164	(CAG)4
BM655	ATCGACATCACCAAGAGAAG	ACCTCCTCCGCCACCTAT	151	(AGG)5
BM656	CGCAGACCTTAGCTACAATAA	ATAGAATCGTGATCTTCGTTG	136	(TGG)5
BM657	ATTACCAACAAAAGATGGACA	AATCCTTGTGTGGTGTATTTG	162	(TAC)4
BM658	AACAGTGTGTGTAGTGGGTGT	GGAGTATCTAGAACGCACTGA	154	(GAT)7
BM659	CTTCCTTCCTCTCTTTCACTC	AGGCAAAGACGCTTAGACTAT	152	(CT)9
BM660	CTTCTCTCATCCACCCTTACT	CAACGTCTCGTGTTTGAAT	148	(CT)6
BM661	GGAGGAGTAGGATGAGAAGAA	TCACCTCCAACAAATTTTACT	156	(AAG)4
BM662	ATTAAGTCACACACCCACATC	CTGCTGTCATAACAAACACAA	145	(GAA)12
BM663	ATTCCAGCCTGTTATTCTTTC	AGATCATCTCCCTGTTTCAAT	153	(AAAT)5
BM664	GAAGAAGAAGAAGACGACGAT	TACTCCCTTCCTTTCTCCTTA	152	(GAA)4
BM665	CATAATATTGAGCTTCCACAAA	AGGAGCTAGGAGGAAGAGAA	148	(CTT)8
BM666	TTTGAGATTGTAGTGCGTTCT	TGAAAAGAGAGAACTTTGTCG	150	(ATC)6
BM667	GACTTCCTCGACCAGGTG	AGATGATCCAACCTTTTCATT	154	(GAG)4
BM668	GACAGCATTATTTGCAGATTC	CCATTCCTGTTCTTGCAG	150	(CA)6
BM669	AAGAAAGGGATACCACAGTTC	TGTCCAGTTTGTCGTAGAAGT	145	(CAG)8
BM670	GTATTGCGAAACAAACAGTTC	ATTTTGGCACAGTACAGTCAG	140	(CCT)4
BM671	TTCACCAACTTCTCCTCTACA	GGAATTTTATCCGAAATAACG	152	(GCT)7
BM672	AACATACAGGACAATGTGGAG	CATCAGGCATCATCATATTCT	142	(GAC)4
BM673	GCCATTCTTCAAGTAGGTTG	GTTCAAACACAAAACTGAAGC	151	(GTG)6
BM674	AAAGATAAGGACCCATATTCC	GATCACTCTCCTTCCGACTAT	148	(TCA)7
BM675	TTGTTCTGCCTTAGTTGTTTT	GCGACTCAGAACAAGAAATAG	143	(AGC)6
BM676	CTCATGTTCTTTGCCATAAAT	ATGATGAAGAGGAGGAAGAAG	169	(CAG)5
BM677	ACTGGTTTAGCAGAGGTTTG	ACGAACGTGAACTGTTTCTAA	166	(TCA)6
BM678	CGATAGTTGAAGAGACTACGG	TACCACTTCTTCTTCCCCTAC	152	(GAG)6
BM679	GAACCCGAGAAAGAAGATAAG	AACCTCCTCACTAGTCTCACC	153	(GGA)5
BM680	GTGCAGGGGACTTAGAATAGT	CTACCTTGATGCCACAGC	155	(CTC)7
BM681	GTTGCACTTCCTCCTCAGT	CTAGCAACAGTCATGATGAGA	171	(TCC)5
BM682	TGATGTTATTGTTGAGCCAAT	CATTATCGTTGTCTTCGTTGT	152	(AGC)7
BM683	TTGAATCAGTAATGGATCACC	TGAATCAGTTGAAGAGAATGG	145	(TCT)6
BM684	CCAATCGTCAGCACAAGT	GCAACATGAACTGTGATCTTT	147	(CAG)6
BM685	ATAACTGAGGTGGAGGAAAAG	ACAGAGGCAGAGAGTCCAC	151	(TGG)5
BM686	GTTGTAGAAACCCCTAAAAGG	TCCACACTCTTCTTCACAGTC	170	(CAG)8
BM687	CAGTCCTGTTCAGAAGAGTCA	TTTTGACGAACTTTTCTCTTG	155	(GAA)4
BM688	AAAGATGACGACTCAAAGGAT	GGTTCAAGATCCTCTTTTTCT	149	(GAT)7
BM689	GACAAATGTTTGAGGACAAGA	GTTCCTTTCTCGAATCTCAAT	183	(ATG)23
BM690	GGGTGTCTAGGGACACTCTAT	CAAACAAGAAGAAGACGAAGA	151	(TCC)8
BM691	AAAAAGAAGAAGCTGTCCAAA	GTCATCATCCTCATCATCATC	102	(AAG)6
BM692	AAATTCATCACAACATTACGG	AAATTTTGATCTCCAGTTCCT	152	(CAT)4
BM693	CATCATCTTCTTCTTCCTCCT	AAACGTAGGAGTTCCGATAGT	107	(TTC)6
BM694	ATCTCAAAATGAAACAAGCTG	GTTCACGTTCTGTTGTTGTCT	152	(ACA)9
BM695	GAGAAAAGAGGAAAGCGATAG	CAAATTCATGAGCATCTCTTC	142	(GAG)8
BM696	TGGTGAACCTATCTACGAGAA	ACTGCTGTTTGTGAATTTGAG	191	(CAA)5
BM697	AATTCACAAACAGCAGTCAAC	GTATCGTTGTGTGACACCATT	174	(ACC)5
BM698	TCACCTCTTCTACCACTACCA	ACGAATCTGCTGAAGTAACAG	117	(CCT)8
BM699	TCTCTACGAAGAAATCCGTCT	AGAAGAGGTGGAAGAGGAAG	136	(CTC)4
BM700	TATCGAGCTGCTATGAGTTTT	GTGGGAAATATTCAAGAATCC	154	(TCT)6
BM701	ACGATACTTTCCCCTCAGTAG	CCTTTCGTAATGTCTTAATCG	157	(AGG)4
BM702	CGCCATTAATTGAACCTATAA	CCCTCTTCCTCATCTTCATAC	160	(GAT)6
BM703	CTCGTATCTTCCTTTGCTTCT	CAGAAGCTTTGTTTGATGATT	169	(CTT)33
BM704	TCACTGAAAATGAAAAACTGG	CTTCCTTATCAGTTCAATAGCA	139	(TAA)6
BM705	TCTCCTTTTTCTCCTTCTTTC	ACGTTTCTGAGAATGATGATG	150	(TTC)4
BM706	AACTGCAGTATCTGTCGAACT	TCCTTCTCCTCCATCTTCTTA	172	(AGG)6
BM707	GGGAAATGGAAAAACATATTC	GATTACACATTTCCGAATGTAA	133	(GAT)8
BM708	ATACTGCTCCACATCCTCTCT	AGCTGGAGAGAAATTCAAACT	149	(CCT)6
BM709	GCTGATGGTGATTATGATTGT	AACAACCAAGACAGTTCTTCA	138	(ATG)10
BM710	CGCAAAAATCATCTAGTTCTG	GAATCTTCATCCAACTTCCTT	154	(GAT)6
BM711	ATAGCAATGATGGTGGTAGG	CCCAACTTTTTCTAAATCCAC	162	(GAG)5
BM712	GTTTCTAGTCCAGGGAGAGAG	TGGTTGTTAATACTGACAGAAGA	186	(CAA)10
BM713	GGAAGAGAGAGAGTGTTTGGT	CCCTCCTTCATTATTCAATTC	178	(GA)6
BM714	GTCACTCCTGTCCGTTGAT	ATATGTAGCCGAAGCATGTAG	168	(TGA)7
BM715	TCTCACTTTGAGGATCACTTG	GCTTCTCTCTCTATGCAACAA	160	(TTG)6
BM716	TCACTGTCTCACTCTCCTCAC	CTAAATCGTTGGCCAGTC	151	(CTC)4
BM717	TTCTTCTTCTTCTTCTCTACGC	GACCAAAAATAATCGATGTTG	136	(ACAG)3
BM718	ACACTGCACTTGTTCACTCTC	CAGACATTACAAAGACCCAGA	149	(AATC)5
BM719	ATGACGACGAAACAACTACAG	TCCAATTTTGTTTCGATACTG	152	(GAG)7
BM720	CAATAAATTTCGAGCCTATCC	GTTTGAGGAGAGTGATGTCAG	165	(TCC)8
BM721	TACCATTATAACGTGGACCTC	TCTCCACAGAAGAGATATGGA	164	(TTC)6
BM722	CAAACGGTATTCAAATTATGC	ATTCAAGATGGAGAAGGAGAG	146	(TC)9
BM723	CCAATTCATACTCCTCCTACA	GAGAAGGAGAAAAAGGAGAAG	137	(CTT)6
BM724	TTCTTCACAAAAGCTAGATGC	GAGGACTTGGAGGATAAAGAG	152	(TCC)4
BM725	TATTTCTCATCACAAGCATCC	CTTCCAGTTGAAGAAGAAGGT	147	(TCC)4
BM726	AGTCCTTAGCCAACAACCTAC	TGAACAGTGATGATACAGTGG	150	(CTC)7
BM727	CTTTATTATGGACGGAGTTCA	GAGAGGATCTGGAGTCCTAAA	156	(AG)13
BM728	AGATTGATCGATTGCCTTTAT	TCCTTTTCTCTCTTAAACTCTCA	133	(GA)10
BM729	TGGAAGTGATGGAGAGAATAG	TCTTTCCTTCTTCTCCCTCTT	149	(AGA)6
BM730	AGAGAGAGTAAGTGGGAGTGG	GGCGCATACTAATAGAACTTAAA	145	(AG)15
BM731	ATGACACAAATCGTTGATACC	GGTTTGTTCCCAGTTAAGTTT	149	(AAT)4
BM732	GTGTGTAAGCAACCGAAATAA	ATTTTTAGCATCATCCAAGTG	154	(ATC)4
BM733	GATCAACTGTTCCCTGCTT	CAGGAGGTACTTGAAACAATG	168	(AGG)7
BM734	GACACCAGAGACAAATCATGT	AGAAACTCAACTGGACACAGA	150	(TTC)5
BM735	TGTCCAGTTGAGTTTCTGAGT	AGGATGAAGAAGATGAGTTCG	165	(TCA)8
BM736	TCCATACAAGTTTTGTTTAGCA	AGCAGCAACAAAGTGTTTTAG	146	(TCT)4
BM737	ACTCTCCTTTTTCTTCGTCTC	GTATGTTGTATGTGGGCAGAC	160	(CTT)6
BM738	AAGAAGGATGAGTCGGAGTAT	CTTTCTCTCCTTCCACTTCTC	152	(GAG)4
BM739	GAGAAGTGGAAGAAGGAGAAG	CCTCCATTACCTCCTCATACA	150	(AAG)4
BM740	TGGAGAAGAATGTATGAGGAG	TTCTTCTTCTTTTCTGCCTTC	153	(AAG)6
BM741	GAGGGAGAGGAAACAGAAGAT	CTCCATTCTTCTTCTCTACCA	150	(AAG)4
BM742	AATAAACTCCTCTGGATGTGTC	GTTGCAGTTTTCTTATCTTTCA	161	(ATT)6
BM743	CACTTCTTCCAGGAATTTCA	ATGCGCTACTAGGTTTTTGTT	158	(TTC)4
BM744	TGATCCTGTAGCACCACTCTA	ACCGATTAGTACCTCTAGTCCA	150	(GCT)7
BM745	CCATCCTCTTTCCTTCATTAT	AGGAGAAGGATTAACAGTTGG	118	(CAT)6
BM746	TCCTCTTCTTTTTCCTCTTTC	GCAGTTAGAATGACATAAGATAG	176	(TC)10
BM747	ATTATTCTCCTTCTCCACCAC	GAAAGAGGAAAAAGAAGAGGA	143	(TTC)9
BM748	ACAGATCCTCAAAAACATCCT	ATGATGAAGAAGGGACAGATT	129	(TCT)9
BM749	GTCTTGTCATATCGAATGCTT	CCATCATATCTTCATCTTCGT	144	(TCA)7
BM750	ATCTCGAATCAGAATATGACG	GATGAAGATGAACTGGAACTG	160	(TGA)7
BM751	TACTTTGGTGGTTCTTTGAGA	GGCTTCAAATAATACCCTTTT	134	(AAG)7
BM752	GGCTATAGCTCAGTTGAAACA	CGTTTCTTAACTTGAGGGAAT	150	(CAT)4
BM753	AAATTCTGAATCTGCTCCTTG	ACTGAGAGCGGAGAATAAGAT	213	(CTC)4
BM754	GTTGGTCCTCCTTATTGGTT	CTACAGCCCTGCCTACTTC	168	(GTG)7
BM755	GTTCTTTAGCGTTGTCTCTCC	CAAACATATGACCATCATCAA	172	(CTT)4
BM756	CTCTCTGTCACGTGGTACAAT	TCATCTTCAACTTCTCCAAGA	146	(ATG)6
BM757	TATTCGCACGACTTCTAACTT	GAGCCCATGAATAAGAACAGT	157	(ATC)6
BM758	GGAGCAGAAGAGGTAAAGAAG	CGAATCCTTGTTTTGTCATT	143	(GAA)4
BM759	GATCGCTATTGTTGTGATTGT	GTTTGCCAGATAAAACACAGA	157	(GGAGG)3
BM760	TTTCCCTCCTCTACTCCTCTA	AAGGAGGTTGGGAAGAAGTAT	148	(TCC)4
BM761	GCAGATTGTAATTGTTGTCGT	GTCACAGGTGTACAAGGAGAA	179	(TGT)4
BM762	CTACAGAACGCATTTTTAGGA	TCCTCCTCATCTTCCACAT	143	(GAG)8
BM763	CAAGTGGGAGATGCTTGA	CATCTTGATACTGCATCACCT	149	(CAG)5
BM764	GCTATTGGAGCAGTATGACAG	GAGTCCATGTCTTCATCTTGA	150	(GAA)8
BM765	ACAAACAGGATACAGTGCAGA	AGAGCCTAATCCTTGAATGAC	157	(ATC)7
BM766	GGTGATAAATGCATCACTAGC	CCCAACTCTCTCTCTCTGTCT	150	(GA)16
BM767	AAGGGAGAATCAGAGAAAGAC	GCACAGCAGTAACTCATCTCT	166	(AG)6
BM768	AGAGAGGAGCAATTGAGAGAG	TATCTACAGGATGAGCTGCAC	151	(AG)6
BM769	AACCCGTTCTTTTGTTAAACT	TGAAATTAGCACCACTAAAGC	135	(ATT)6
BM770	ATCGTCATTCTCCTTTCTCTC	TGATCAGGGTGAACTGATAAC	171	(CTT)6
BM771	TCTTTCTTCTTCTCCTCATCC	GTGACAGAGGAGTGAGAGCTA	148	(CCT)6
BM772	TCCTCTGTCACTTCTCCTGTA	ACAGCGTTCAATTGTCATAGT	154	(TCT)4
BM773	GCTGTAGCTCTCACTTTTGTC	GTTTTGGCAATTTCTTGTTT	149	(CAT)9
BM774	CTTCTGTCACTCCTCCTGTAA	CAGAAGGAATAAGAGCTACACC	161	(TCC)5
BM775	CGGTGTAGCTCTTATTCCTTC	AGGAAGGGTGTTTACAGTAGG	167	(CTC)4
BM776	CGGTGTAGCTCTTATTCCTTC	CAACTGGAGGAGGACTAGAAT	126	(TCC)5
BM777	CCGGTGTAGTTCTTACTCCTT	GTGGAGCTGATAATTGAGGA	151	(CCT)5
BM778	CATTGACACTGACGATATTGA	TCTACCAAGCTCTTCTCTGTG	157	(TGA)8
BM779	GAATCTTGATACGGTGGAATA	GAGGGATAGAGCTTAAGTTGG	166	(AC)30
BM780	CTCCACTCCAGGGACTTC	GATTTAGTGAACGATGATCCA	164	(CTT)4
BM781	GGAGTTACGTCGTTCCTGT	GAATGCCCTGAGAAGTGAT	157	(CCA)6
BM782	GCTACCAGTAAAGTCAGAGCA	TGACTGTGTCTTGCTGAATG	160	(GCA)7
BM783	CACATGTTCTTGTGGTAAACA	TAAAGATGAAAGGAAGGTTGC	172	(ATT)7
BM784	CTCACTGCTTTAACTCTAGCC	ACCATTTGAAGCAAAGAGATA	154	(TCT)12
BM785	GAGACATATTGAACGGTGAGA	AAACATCTGATCCTCACTCAA	153	(GAAG)3
BM786	AGGAAGATGAAGAAGAAGACG	GGAAAATTTATCACCATCTCC	155	(AGA)5
BM787	ACCTTACAGTCAATCCTCCTC	CAGAGAAGAAAAATGAAGCAA	146	(CTC)6
BM788	TTTATCGAGTTCTTTGCTTCA	TGAGAAGTAGACGGATGAGAA	152	(TCT)4
BM789	AAGCATATAGCCACTCAACAC	ATTGAAGTTTGATGTCCAAGA	146	(GAA)6
BM790	GCTCTGGAATTGTGTTAATGA	TCTTCTTCGTCTTTTTCTTCTT	150	(GAT)6
BM791	CTACGATAAGAGTGTGCATCC	AACAGACGAATCAACAACAAC	148	(ATG)7
BM792	ACTCTTTTTCCTGATCATCCT	GAAGAAGAAGACAAAAGAAGAAA	183	(TTC)4
BM793	ACAGAGAGGAAAGATGTACGA	AGTCTCTCACACTCTCTCACG	159	(GAGT)3
BM794	CCTGATCTGAAAGCTAAACAA	CCTTTGCACTTGAGTTGATAC	159	(TAT)6
BM795	GTAGGAATGAGTCGATCAAAA	AACACTTTCAAGTCCTGAGTTC	155	(AG)11
BM796	AATCAAGATATGATCGAACCA	CCATTTGCATTTTTCTACTTG	152	(GAA)4
BM797	GCCGTAATGTACAAAGACATC	TGAAATTCAAGTAGGAGAGCA	145	(CCT)6
BM798	TATACATCGGATTTTCGTTTG	GAAGGATGAGAAGAGGATGTT	163	(CAT)17
BM799	AGAAGGTGGTGGAGGTGT	ATCATTTCTTCATTGCAGCTA	165	(GGA)5
BM800	GTGGGAAAATGTAGATACCAA	CTCACGTGACTGCTGCTC	152	(CTC)6
BM801	CTTCTCCCACCTCACTTGT	AGGATCCAGTTGTACAGGAGT	150	(CTG)6
BM802	AGAACCACTTGCTAAATCCTT	ATAACTGCTTTTTCGGGTTTA	132	(TGC)7
BM803	TCTCCAACATTCTTCACAGTT	AAAGAGTGGGAGATAGAAGGA	154	(CTC)4
BM804	CTTCTTTCTCCTGTGTTTCAA	GAAATGAGGAGAAGGATAGGA	136	(TCTCC)3
BM805	CTCAACAGCAACACATTAAGA	TATCAACCGTATTCCAACAAC	151	(GT)10
BM806	GTCTGCTGACAATTTGAAAAA	ATGATTTTGCAACACTGGAT	173	(TCA)6
BM807	GAAAAAGAGGAAGACAGGAGA	CACATCCTCTCACTCCTACTG	107	(AGA)6
BM808	CAGTAGGAGTGAGAGGATGTG	CCTTCTCACGAACCTAGTCTT	136	(GAG)6
BM809	GGATCAATTGAAAGAGATGAA	CCTAGAAGCTTCCACATTTCT	153	(AAG)5
BM810	TACCTCGGTTGGTATAGTGTC	GAGAGAGCTGAAAGGAGAGAC	159	(CACT)3
BM811	TAGTGACGTAGTGGAAGGAGA	AGAGCGTCACTAATTCCTCTT	141	(GAA)8
BM812	TCGACACCATACAACTACACA	TACTAACTTGGCGGTCATCT	163	(AGCA)6
BM813	ATCAGGACTCCAATCTCCTAT	GATGGAGCAAGTGGAGAG	133	(TGA)6
BM814	AATTTTATGAGAGATGAAGATGC	GCCGGTAATTCTATGTAGGTT	149	(TGA)6
BM815	GGAGGAGAAGTAAGTGGTGTT	CTCCTTCATTCCCTCCAC	166	(AGG)6
BM816	GGAGGAGGAGGAGAAGTAAGT	CTCCAACACCTCCTTCATT	181	(TGG)4
BM817	GAACTGGATCAAGGTGAAACT	GTCGTCGTTCTTCTTCTTCTT	148	(AGT)4
BM818	GGTGAAACTTCAGTCCAAAAT	GGTTGTTGTTGTTGTTGTTGT	158	(AGA)10
BM819	CACTCATCCTCTCCATTCATA	AAGAAGAAGGACAAGAAGGAA	158	(CTC)4
BM820	CCCTATCAACTCACTTTCTCC	AGAAGAAGAAGAAGAAGATGGA	154	(CTT)5
BM821	GGTCTTCCTTCATTTCTTCAT	AGAAGTAGACGGTGACAGGAT	137	(CTT)4
BM822	TCATTTCTTCATGTTCCACTT	AAGAAGAAGAAGGGGTGAAG	162	(CTT)4
BM823	TGATATCCTGTCACCGTCTAC	CACGAAGAAGAAGAAGAAGAA	173	(CTT)12
BM824	TTCTTCTTCTTCCTTCATCTGT	TGAAGATAGTCAGACCCAAGA	150	(CTT)8
BM825	AATGAAGAGGGGGTATTGAG	TTGCCTTCTTCTTCTTCTTCT	160	(AGG)9
BM826	GGTGAAGTTGATGAGGTGAT	CTCTTCCACCTACTCCTCCT	141	(AGA)5
BM827	AACAACAACAAGTATGCCTAGTA	GTCGTTTGTGTGTCTAGTGCT	193	(TAG)5
BM828	ATACTTTGCCATTGTTCTCCT	TGGAGTCTACCTTCAAAAACA	170	(CTC)4
BM829	TCCTCCTCCTATGCTAATCTC	TGTGGAGTCTACCTTCAAAAA	146	(CCTTCT)3
BM830	TCATCCTATTCCTACTTGCTG	GCCTTTAATAGGGTGGAGTTA	155	(CTT)6
BM831	TTCCTTCTTCTCTACCTCCTC	TGTATAACTGGGAATGTCGTC	217	(CTC)5
BM832	TTGATTCGTTCATGCTTAGAT	AAAAAGGAGGAACAAGAAGAA	148	(TCT)8
BM833	TTCATCATCATGTTTTTCTCC	TCACACCTTTAGTTGAAATGG	155	(TCT)4
BM834	AAAGGAGAGAAACCTGCTAAG	CTTCATCGGAATTATCAACAC	166	(GAT)8
BM835	AAGAAATGAGTGATGACTTCG	CATCTTCTTCTTCCTCTTGGT	150	(GAT)5
BM836	GAAGAGAGGAAAAAGGAAAAA	CCTGGATTAAGTTGATGACTG	149	(GAAGAC)3
BM837	CTGACTACGACACCAAGACAT	ATCTTTTTCTCCTTCATCGTC	176	(AGA)5
BM838	AAGAGAGGAAGAAATGACCAA	GTGATCTCCTCTCTGGATCA	148	(GAA)6
BM839	TTCTTAGCCATGAAAACTTTG	CCTTCTTCTTCTTCTTCTTCG	154	(AAGC)3
BM840	TTCTGAAAGTTGGATATTGGA	TCTCCTCACGTCTTTCTCATA	163	(GAA)5
BM841	AAGGTGGAGAACGAGATAAAT	TTCTCCTGTCTTCTTCTTCTTC	185	(AGA)4
BM842	AAATATCAGCCAAGAATTTGAC	CCTCCTTCTTCTTCTTTATCG	147	(AAG)4
BM843	AAGAATTTGACGACGAAGAA	CCATTCTCTTCTACTCCTCCT	154	(AAG)4
BM844	CGTCATCATTCAAAAATCATC	TGTATTTCTTTTCTTCGGTTCT	150	(GGA)4
BM845	TTACAGTAGTGTGGAGGAGGA	GCATTCCGTTCTCTTTCTATT	142	(GAG)4
BM846	GAGGAGAGACTCAGGAGAGAA	CCATGAAATCCTACATTGGTA	185	(GAG)4
BM847	TTTAATTCTCTCCTCCTCCTC	GACTATACTAGTGGCCGTCAA	173	(TCC)7
BM848	GCCGAAGAAGAAGTCTAAGAA	CTTCACTTCTCCTCAAATTCA	135	(GAG)7
BM849	TGCCGAAGAAGAAGTCTAAG	TCTTCTTCTCCTCTCCTTCTC	166	(GAA)4
BM850	TCCTACCTCCTCATTTCCTTA	GAGAGAGTGAGAGGGAGAGAG	144	(TC)11
BM851	CTCCTCCACCTACTACTCCTC	GGAGAAAGAGATAGGGAGAAA	149	(CT)6
BM852	CTCTTTCTTCTCCCTATTTGC	ATGATGATGATGATGGTGAAA	141	(CTC)6
BM853	TCTCCCTATTTGCATTATCTG	TAAGAGGAGGAGAAAAAGGTG	175	(CAT)7
BM854	GATGAGGAGGGGGATTATAC	CAGTGCTCTCTGCTCTCTTC	148	(GAT)6
BM855	GGATGATGATGATGATGATGT	ACACCACTGTCGAATTTCTC	168	(GAA)4
BM856	TTCTTCTTCTTCTTTTCTGGTT	GTAGAAGGTTGAGGGAGAAGA	152	(TC)7
BM857	CTGGTTTCTCTCTCTCTCTCA	GGAGGAGCATGTAGTGTAGAA	151	(CCT)4
BM858	AGGAGGAGAAGCACTAGACAG	TTTTCATCACTCTCTGACACC	159	(AGG)6
BM859	GGAGGAGTATTTCAGAGGGTA	GACATCCTTCTATCCCAGCTA	149	(GAA)4
BM860	TCTCCTCATTTCACTAAACCA	AGAAAGAGAGTGGAATGAAGG	142	(TC)6
BM861	TCTCCTCATTTCACTAAACCA	GGGCTACAGGAAGTAAGAGAA	159	(CCT)5
BM862	CAACTTTGCAGTTCAAGAAAG	GGAGATGATTCTGACAATGAA	155	(TCA)4
BM863	GCCGGTAATTCTATGTAGGTT	TTTATGAGAGATGAAGATGCTG	149	(CAT)7
BM864	GCTATTTACATGGGTGGTTCT	TTATTTGTTAGGCACCTGCT	138	(TCAA)6
BM865	TCGTTCTTCACTTCTCTTCTG	CAAACGGGTGTAAATCAACTA	140	(TTC)6
BM866	CTGTTTCTTTTCTTCCCTTGT	GAGAAAAATTGAATTGAAGTAGC	119	(TCT)6
BM867	CAAAGGAGAAGCACAAGG	TATTCTTCGTCGCCTTCTT	120	(AGA)6
BM868	CTCTCACTCTCTCCCAATCTC	ACGGTAGTGGTGTTGTAACTG	154	(CTCTCA)3
BM869	GGGAGTGTCTGGATGAATG	GGGTGTAAGAAGATGGAGAAG	139	(ATC)7
BM870	AAGTAAGCACATAGCTGGTCA	CTCTCCTCCTCTTCTTCTTTG	131	(AAG)6
BM871	ATCTTCAGTCTTCCTCTTTCC	AGGAGGACGATTAGGAGTAGA	145	(CTA)5
BM872	ACTTCCTCCTCCTCTTCTTTT	GAAACTAGCTGAACCTAGTCAGA	165	(CTT)7
BM873	GGGACGGAAGTGAAAGAG	CTTCTTCTTCTTCTTCTTCTCAT	100	(GAT)9
BM874	TTTCTTCTTCCTCCTCTTCTT	AGTAAGGGGAAAAGGTATCG	177	(TTC)6
BM875	CGGAGATGTTATCTTTTTGAA	TTTGGCCTTATAACTTCTTCC	150	(AGG)4
BM876	TTTGAAATCATCATAGCCTTC	ACCTCCACCTACTCATTCACT	148	(AAG)5
BM877	TGAGACAAGAGAAAGACAGGA	GTGTGAACAACATCAAGGACT	145	(GGA)6
BM878	GTTTCTTTTCTTTGACCGAAT	GCCTTCTTTCATCTTCTTCTC	142	(AAG)6
BM879	TGATGATGATGATAATACTCG	CCTTCCTGTCTTCTTCTTCTT	129	(TGAAGA)11
BM880	TGTTTCTTGTTTCTTTTCGAG	ATTCATCAATGAAGCAATCA	145	(ATA)8
BM881	CTCTTTCCTCAGCTAACATCA	GAAGAGAAGTTTGGAGAGAGG	150	(CTC)6
BM882	CTTCTTCTTCTTCTTTTTCACC	GAAGGAGAACATTGTGAGGA	129	(TTC)4
BM883	TCATCATCATCATCATCATCT	GGAAGTGGAGAAGAAAGTGAG	162	(TCT)4
BM884	CTTCCACTGTCTTCTCCTTCT	ACTTGTCTCAATCTTGCTGAG	150	(TCT)18
BM885	TATCCTTCAATTCCTTCAATG	GGAAGACAACTTTCTGCTCAT	157	(TTC)4
BM886	GTTCTTTTGTTCTGTTTCTTTCT	AGAAGAACAGGTTGAGATTCC	169	(AATA)8
BM887	GGACAGGATGATGAGAGGA	TCAACAATAACTATGTGTCTTCC	106	(GAG)8
BM888	CTGAATCAGCCTGTCTCTCTA	GATGATGATGATTCTGAGGAA	133	(ATC)5
BM889	CTTTTCTTCTCCTCCTTCTTG	AAAAGAACCTTATTTCCATCG	144	(TCT)6
BM890	GGTACCCTAGCTTCAAGTTTT	ACACACACACACACACACAC	125	(GT)13
BM891	GGTGAATACGGAAAAGCAC	CTCTATTTCACTGCACATTCC	121	(GAA)8
BM892	CTTTTGTTTCTGTTTCTTTTCC	AGAAGAAGAAAATGACAGGATT	185	(ATC)9
BM893	CGAAAGTTCGATCACTTGAAT	CAATATACGCAATACTCAGCA	186	(GTT)7
BM894	TATTCTCCATAATCGCAGTTG	TGAATTGACATAGGAGAAGGA	152	(CTT)4
BM895	GTTCTCCATCACCTTCTTCTT	ACAGCTGATGAATGTTTGAAT	147	(TCC)4
BM896	CTCCTCAGCTGCAGAAATC	GTTTTCTTTTTAGTCCGGTGA	150	(CAG)7
BM897	AACCATGGCTTCTCTCTCTAT	CACTTGAAGTCGTCTTCCTC	141	(CAA)6
BM898	CACTCTTCAATGTCACCACTT	TGTTTCGAAGAGACCAAAGTA	158	(TTC)6
BM899	CTTCTTCTCCTTCGACTTCTT	CGGAGAGAGAGAGAGAGAGAG	104	(CTT)5
BM900	TTGATGAACAACGGATTATGT	TTCTTCTTCTCCTCCTTCTTC	161	(GAT)6
BM901	AGCAATTTGAGTAGGAGTGAGT	TCTTCTTCTTCTTCACCATCA	158	(AGA)4
BM902	TGCATATAAGCTATGCATCTG	TCATCATCATCATCATCATCT	162	(TGA)9
BM903	TTGATCAGTTTTCTTCTGTCAA	GAGAAGAAGAAGAAGAAAGAAAT	122	(TTC)4
BM904	TTCTACTTTCAACTATTCTTTGG	GAAGAAGAAGAAGAAGAAAGAAA	189	(TTC)5
BM905	GCTCCGATACACTTGTACACT	GTAGTCGAATAGGGAGGAATG	134	(CT)9
BM906	CCCTAACTTCGTCCTCCTA	TCAAATTGAGCAGTATTGTGAT	100	(AATC)5
BM907	TAATCCAATACATCAGGTTCC	TAGAGAGAGAGCAACAGCAAC	145	(TGT)5
BM908	GTGTGTCTAACTGCCAGATTT	CTGTTGTGATTTTTGCAATG	150	(AGA)7
BM909	CTTCTCGTTCTTCTTTTTCCT	CAATGGTTTATATGTGGCTTT	113	(CTT)4
BM910	CTCCTCCTTCTTCTTCTTCAT	GTTGATTGCAAAGGATATTGA	186	(TTC)9
BM911	GTTTCTTGTTTCTTTTGTTTGAG	GGTGCTATCCCACTCTACTCT	171	(TAT)6
BM912	CTACTAATGGTCTTGGCATCA	TCTTTTTGTTCCTTAGCTGAC	130	(GAT)21
BM913	TTCTGTATTTGTATGGCTGGT	GGTCTAGATCCTACAACAGCA	146	(TTAT)6
BM914	GGATTTCAATTCCACCTTCT	AAGAAGAAGAAGAAGAGGAAAAA	179	(TCT)4
BM915	CTTCTTCTTCTTCTTCTCCTCA	CAAAAAGCAACATGAAATGA	121	(TCC)4
BM916	CGTTGAGATACATGATGACAG	CACAAAATCCGGTTACATTC	154	(TAT)6
BM917	GTCCAGTAGTTTCCCAGAAAT	AACTATTTGACGGTACGAAGTT	152	(AGTG)5
BM918	TGGATTGTTGCTTAGTTTGTT	AAATACCCCTCTCACTACACC	131	(TAA)6
BM919	AGATGATGATGATGAAGGAGA	TTCCTACTCCTTCCTTTTTCTA	151	(AGA)7
BM920	GAAGAAGAAGAAGTGGAGAGG	TCATCTTCCTAACCATCATCA	125	(GAA)4
BM921	ACAGGAGGAGACGAAGAAAA	CTCCCTCTTCCTCTTCCA	150	(GAA)8
BM922	TGAGCAACAATATTAGGGAGA	TCGTATGTGCACAGATTTTTA	188	(TAT)6
BM923	CCTCCTATTTCCTTTATACGC	ATGATGATGATGATGATGGAG	148	(TCT)4
BM924	AAAAATTACTTTGGTGGGTCT	ACTAGGAAAAGGCTTCAAAAA	147	(AAG)6
BM925	ACGTGACTTGAAGAATGTTTG	TGTCGTTTAGCTTTTACCAAC	159	(AAT)6
BM926	TATTTACGGTCCGGGGTA	TAATCTTCTCCTGTTCCTCCT	101	(AGT)4
BM927	GGTCCGGGGTAAGTAGTAGT	CGTCTTCTTAATCTTCTCCTGT	102	(AGA)8
BM928	CTTGAATAGTCAATCGGGTTA	AAAGGCAATTAATCAATCACTC	144	(GA)10
BM929	TTTACTTCACACTGGTTCCAC	CGTCGTCTTTTTCTTCTTCTT	160	(GGA)4
BM930	CCACCTTACGGTAGAAGAGAT	AACTCCTGCTGTTTTCGTC	161	(GAA)8
BM931	ACCAAAAGAGAAAAGTTTGTATG	ATTACATACGAAAACGACGAT	135	(AG)9
BM932	CTGTTTCTTTTCCAAATATCG	TCCTCCTCCTACTCCTTCTTA	148	(AATA)11
BM933	GTCAAATGCCTGTTGTTTTAC	TGTGGAAGAACAGTGTTGATA	138	(AATA)5
BM934	TCTTCAATTTCCTCCTCTTTT	GGAGAGATGGGTAGAAAGAAA	142	(CTC)6
BM935	TGATGAGGAAGGTCACTAAAA	TCCTTCTCCTTCTTCTTCTTC	110	(GAA)8
BM936	GATGATGAGGAAGGTCACTAA	CTTCTTCTCTCCTTCTCCT	121	(AGA)5
BM937	CTTTTGATGAGATTGTTGGAG	ATCTCCTGTTTTCGTCTTCTT	154	(GAA)5
BM938	GGAGGAAGAAGAAGAAGAATG	ACTCTGGTATCCATCTCCTGT	149	(AGA)5
BM939	AATTTTAGGCCCTCTCCTATT	AAAAATACTGCTCCATGAAT	145	(ATA)6
BM940	AAGGAAGAAGATAATGAAGAGG	TTCCTTTTCTACTCAGCATCA	140	(GAA)6
BM941	GAAGAAGAAGAATGATGCTGA	TGCTTGCTCTAGTCTCGTTAG	152	(AGA)4
BM942	GGTCTGTCAAGTGTCAAACAT	AATCTGTTTATCCATGGGTTT	140	(AAT)6
BM943	CTTGTATATTGTGCTGTTGAAAA	TACCGGCAATGTTCTATTCT	173	(ATT)6
BM944	TTAGTTCTTATCCTGCCTCCT	TGGTTCCGGTAGATTTTAGTT	161	(ACTC)6
BM945	TTCTTCTCATCTTCTTTTCCAT	GGTGAAGAAATTGGAAGAGTG	146	(CTT)4
BM946	CATTTCTCTTCTCCTCCAACT	GGAAAACAGAAAGAAGAAGGT	145	(TCA)7
BM947	AGAAGAAGATGATGATGGAT	TTCTTTTCTTTTGTTCTCCTTC	115	(GAG)5
BM948	GAAGAAGATGATGATGGATGA	TCTTTTCTTTTGTTCTCCTTCT	113	(AGA)7
BM949	TTTGTTATCTGTTGCCAATCT	AAGCCTAATCCCTGTTTGA	145	(TTC)6
BM950	GAGGGTGATAGAAAGGAGAGA	TAGGCAACAGCCTAGTAACAA	143	(AGAT)5
BM951	TTCTTTTGTCTTCTTCTCCTTC	ACACACTGGTGAAGATGAAAT	168	(TTC)9
BM952	CAAAAATCATCAAGCAAGAGA	TTTCTTTTTAGCCTTGTCCTT	150	(CAG)6
BM953	TCAAAGAGACAGGACAGTTTT	ATGCTGCAGTATTTGAAAGTC	161	(TTA)7
BM954	TCTTATTCCTACTTTCCACCA	CGAAGAAGAAGAAGAAGAAGC	152	(TAC)11
BM955	AATACATCAGGTTCCTGTTCC	CAACAACAACAGCAGATACAA	149	(TTG)6
BM956	TGTTGTTGTTGTTGTTGTTGT	GGTTGCTGAGAGACTAGAGAG	150	(TGT)4
BM957	GAGAAGGTGATGAAGAAGAGG	TCTTTTTCTCCTCCGTCTAAT	158	(GAA)6
BM958	CTCACTCTCATTGGATGTTTC	CGTAGACGTAAGGTTTAAGTT	115	(CTC)8
BM959	CTCCACACATCTGTGTAATCA	TGTCAAGTTTTTGTTCTCATGT	178	(AGAT)6
BM960	TCCCCTACTTCTATTTCACCT	GAAAAATAGAGGATGAGGAAAA	154	(TTC)4
BM961	AGTATGTTGTCCTTGGAGGTT	CTGCGATGTATTGTTTCAACT	149	(AGG)7
BM962	CTTTTTCATCTTCTCCTCCTC	ACAACAACAACAATAACAACG	166	(CTT)5
BM963	TCCGATCAAACTAGAAAATCTC	GGGAGAAGATGAAGAAGAAGA	168	(TTG)4
BM964	TTCCTCTCATCCTTCTTCTTT	GGGAGGGTGGGAGAAGAT	119	(TTC)7
BM965	GTTATGCATCCACATAAATTG	CGCCCTAATAAAGGCATATAA	154	(GA)6
BM966	TATCAATGTCCATTCTTTGGA	GTCCTAACTCCGCCCTAATA	128	(GATT)5
BM967	CTTCTTCCTCCTCTTCATCAT	CTTCAGACTTTCATCCTTGC	158	(CTT)4
BM968	AGCGTCCATTATATGTTTACG	AGAAAGCAGGAAGAAGAAGAA	152	(CT)6
BM969	ACGACGTCATTTGACTAAAAA	TCTTCTTCTTCTTCTTCTCCTC	163	(AGA)4
BM970	TCCTACTTAACGTACAGGAAAAG	AGTTCAGTAGGTTTATTTCCAA	172	(ATA)6
BM971	TAGTCCATTGGTTTTGGAATA	ATAAGATTACAGTCGCGGTTC	135	(TA)9
BM972	CTTATCAAATTCTTCCACCTG	CAATATTTGACTTTTCAGCAGT	158	(ACTT)5
BM973	AAGAGGAAGAGGAGGAGGA	GATGACCTTCAGAGTCAAAGA	125	(GAG)6
BM974	GGTAACCTTTTGCTATTCCTC	GTTCTATCCCGATCATATTCA	156	(TTTA)5
BM975	TGATAGAGAGTTACTGGGAAGG	TTTAGCTTATATTGAGGCATTG	149	(ATT)7
BM976	TTCTTCTTCTCTGTTTTTCTCC	AAAGGAGGAGCAGTAGACAAT	169	(TTC)6
BM977	GTTCTTGTTTCTTTTCCCTTC	GAGGAGAAAGAGAAGGTGATG	140	(TTC)7
BM978	TGTTTTGTCTTGTTTTGTGTG	TTTCTTTTCTTCTTCTTCATCTC	150	(GAT)6
BM979	GAGGTCCTTGTCTGGTAGTTT	TCAGTGCATCCACTATTTCTT	216	(AAT)6
BM980	TCTGCAAAGCAATAGACAAAT	GCTTCTCCAGCTCTCTACAGT	149	(TCG)6
BM981	CTCATGGAATGGAATACAAAG	CCCATCTAGTACCTCTTGCTT	156	(AAC)4
BM982	GTTGTTCCTTCCCAATCATA	ATTAAGGAATCTGCACCTTTT	117	(ATAA)5
BM983	TATTTGGAAAGCATTACTTCG	ACATCTGCTTTATTTCGTCAC	148	(TAA)4
BM984	GGTATGTTGAACAAGATGAGG	TCTTCTTCTCCTTCCTCCTT	139	(AGA)8
BM985	CAATAGCTTACAATACAGCAAAA	AACCGTTAAACGTAAACGTAA	182	(TAA)4
BM986	TCTTCCGTTTTTAGGTTATGA	GACTTACTAAGGCTCAGCAGAT	142	(TA)9
BM987	TACTGTCCAAACTTCTCGAAT	GTTTTAGGCAATAGCCTGTTT	147	(TTTA)5
BM988	CTACAGCATCGTCTTCACTTT	GATGATGATGATGAAGAAGGA	134	(CTT)5
BM989	TCTTCATGTTCTTCTCCATTC	TGAGAAAATAACAGAGAAGTGT	146	(TCA)6
BM990	CCAATATTGATTGTGTCCATC	GTAGGCCTATTGTTTTCACCT	136	(TATT)5
BM991	TATTTACGGTTCCGGGGTAT	TCATCATCATCATCATCAACA	105	(ATG)4
BM992	GTTCCGGGGTATTGTATGAT	GCATATTCTTCTTCTCTTTCATC	115	(TGA)5
BM993	AGCGTGGGGTCATTATTTA	CTCTCTCCCTCTTTCACTCTC	149	(AGC)8
BM994	CTATTTACGTCCGGGTCTTT	CCTTCCTTCTTCTTCTGTGTT	102	(TTC)8
BM995	CAATCAATCAATCAATCACTTC	TAGACAGGATGAGACGAAGAA	143	(CTT)7
BM996	CACCTTCTTCTTCTTCTTCTTC	AGGGAGGGAGGAGGTGGA	152	(TTC)8
BM997	ATTAACTTTGGTGGCTTCTTT	GGGGTATGGCTTCAAATAATA	150	(AAG)7
BM998	TATCAACTATTTCCGCTGTTC	TCACTCCTCCTCCTCCTC	143	(AGAAGG)3
BM999	TTGCACACTAAAGAGTAGACCA	ATCCTAAATAGAAGTGGCACA	148	(AAG)6
BM1000	CCTCTTCTTCTTCTTCTTCTTCT	GATGATGATGATGATATTGATGA	124	(TCATTA)3
BM1001	TTCTTTTTGTATCTCCTCTTTCA	ATGAATCCTTCTCTCATTTCC	156	(TCT)7
BM1002	GCATCGTTATCTGATTCATTT	TGACTGTACACTAAGCATTTTTG	163	(ATA)6
BM1003	GTGACTCGCTCCCGCTCT	GCAGCCTTTACTTAAGACAGTAG	112	(CT)9
BM1004	ATCGTCTACTAGCACACCAAA	ATTCAGAATATGGATCCTTGG	153	(ACA)8
BM1005	GGACCTGAATGGTGGTAATA	AAGACGTGATAACGAATTTTG	187	(CT)10
BM1006	AGGAAGAGAAGGTTGATGAGT	TGACCTTCAAATGTAACCAGT	164	(AGG)4
BM1007	CGTTTGTTACAACACTTTGTG	CTCATCGTATTCCTATTGAACA	111	(ATTG)6
BM1008	AGGTCGAGTTCCTTCAAAGT	ACTGATTACCTTTCTCGCTTT	135	(TAA)6
BM1009	AGGGTAAAGAAAAGAAAAGAAAG	CTGTAGCCAAAGCACACTACT	124	(GAA)7
BM1010	AGGTGAATAACTTAGGTTTGTTT	TCCACCTCTTCTTCTTCTTCT	157	(AAAGA)3
BM1011	TCTTCCTACTCTCTATTATCCTG	TAGAGAAGGAGAGAAAAGACA	104	(TCC)4
BM1012	ACCCAGGATTGTGTGAACT	ACCTGTCTTCGTCTTCTTCTT	139	(AAG)8
BM1013	AAGAAGGAGGAGGAGGATAAG	TCTTATTTGACATTCCGTCTC	147	(AAG)4
BM1014	TGCAATATGTTGTTTCAACTG	TTCAAAAATCCTCAAACACC	183	(TTC)6
BM1015	ATTTCTTATTGTCGGATCCTC	ATGATTTTTGGGTATTGGTCT	146	(AC)12
BM1016	TTAACAAAATCAGCTCCATGT	GCATAAGGCATGAACGTAATA	223	(GT)40
BM1017	GCAACAATAGTTTTGCTGTCA	AGAGCAACTCTTTGTATGAGC	144	(AATA)5
BM1018	ATGGAGTTATCGTGTTCACTG	CCTTTAATTGACTGGGCTAAT	159	(AC)41
BM1019	TGTCGACAAAGAGAACAAATC	CCATCCTTCTTTTTCTTCTTC	138	(GGA)6
BM1020	AGAAGAAGGAAAAGGAGGAG	TACTCTTCTTCCATCATCATT	129	(AAG)7
BM1021	CCTGCTTCTTCTTCTTCTTCT	AGAATTTCCGAAAGTTTGAAG	125	(TCT)5
BM1022	GATGACCTTGAGGTTAGGTGT	AGGTCATCTAAGTCAACCAAA	143	(TAA)7
BM1023	TTTATTCCAACTGCGATGTAT	GAAAAGGAGGAGGAGTAGAAA	139	(CTC)6
BM1024	AAACCATGGAATAGTTGTGTG	TTCCTTTTCCTTTCTTCTCTC	154	(AG)11
BM1025	CTACAAACATCAACGGAAATC	TCTTCTTCTTCTTCATCTCCA	170	(AAG)4
BM1026	TCACCATCTTCTACTCCTCCT	GAGAATAGCTTGTTGAAAGCA	149	(TTC)4
BM1027	TCAACAAGCCCAATAATAGAA	GTTCCTACGACGACTAGTTTG	137	(ATA)6
BM1028	CCATTTCTCACCCATACACTA	GTTCTTTTGTTCTGTTTCTTTAC	201	(AAT)4
BM1029	ACTCTCTTTCCATTTCTCACC	CGTTTGTTACAACACTTTGTG	113	(TCAA)7
BM1030	CCTACTCGAGACACAACAAAC	GTCAAAGTAACAGCTGTGAGAA	148	(CA)10
BM1031	ACCATTCGCCTAATTAAAACT	TGATGATGATGATAATGTTGC	159	(TCT)9
BM1032	TTACGTTCCAAATTTCAAGTC	GTGTGTGTGTGTGTGTGTGTA	133	(AC)13
BM1033	ATTACGGAGAGACGCATTTA	CTCCTGTTTCTTCTTCTCCTC	104	(GAT)6
BM1034	CTCATCAGTCTCTCCTGATTG	AAGATGAAGAAGAAGGAGGAA	149	(CTT)4
BM1035	ACCTCTTCCTCTTTCTTTCAT	GAGGAGATAGAATTACAAGCGTA	149	(TCTT)3
BM1036	GTGAATGCCTGTTGTTTTTAC	AGGTAACCTTGTGCTATTCCT	167	(AATA)6
BM1037	GGGCAAAGAGAAGAGAGAATA	TGGTGTTGAAAAATATTACGC	158	(AGG)6
BM1038	TTTTTGTACACTCTCCGATTC	CTGTATCAATGTTTGGAAAATG	147	(TTA)7
BM1039	ATTTCCGTTGATACATTTTCC	ACACGCACTTTATGACGTTAG	147	(AAAT)4
BM1040	GAACTGAGAGTGCTTCTTCAC	GTCCGGGCTTCTTCTTCCT	170	(GAA)10
BM1041	TCTGCTACTAGTTGACATTTTTG	AACAACAACAACATCCAGAAC	146	(GTT)4
BM1042	TTGTACTGGTTCTGGTTGG	CAGTACAACAACAGCAACAAC	146	(TGT)6
BM1043	TTAAAACACCTCCACCAGTTA	AAAGTGTGACTACGATGGAAA	152	(CAT)6
BM1044	CATGGTGTGCTTCCTAGATTA	GTGTCCATGGATAGCTATTTT	120	(AG)6
BM1045	TCTTCTTCCTCCCTATTTCTC	CCGGGTGAAGAATGTAGAA	141	(TCT)5
BM1046	GTGATAATGAGATGAGGGAAA	TCTTCATCCCTATCTTCTTCC	147	(AGG)4
BM1047	TGAATTCAACTCTGACCATTT	CCATTCTTTGGAAAGGATATT	148	(CT)9
BM1048	GTTTCTTGTTTTCTTTTTGC	AAAGTGTTGTAACAAACGTCAA	112	(TAT)4
BM1049	TCTTAAGCAGTGGTATCAACG	GAGGATTTTGCCTTTTAGTTT	171	(GAG)4
BM1050	GGAGGAGGAAGAGTAGAAGAG	CCCTACTAGCTTGAGCTTCTT	159	(AGAT)6
BM1051	AGAGAGACCATCTCAGGAAAC	TTCAAGTCATTCCGTTAATTG	138	(TG)8
BM1052	CTTTTCGAAGAACTCACTCAA	TAGGTTACTCCATTCCTCTGG	148	(ACA)9
BM1053	CCAGAGGAATGGAGTAACCTA	GAATGGGTTGTAACCATTGTA	148	(ACA)4
BM1054	GTACATAAACCCTCGCATTC	ACACATAACAGTGCGAAACAT	154	(TA)10
BM1055	GAAGATGAAGAAGAAGGAGGA	TCAATTTCTCTTGTAATTCTACC	135	(AGA)6
BM1056	GTTGCAAAGCTGAAACTTAAA	TTCCTCCTTCTTCTTCATCTT	156	(AAGA)3
BM1057	CAGCAACGTAGTTACTCCAAT	GGTCCTGTTCTTCTGAACATT	146	(TGA)8
BM1058	TCCTCTTCTCTTACTTCGTCA	GTTTGCAGACAAAGTTCACTC	167	(ATA)6
BM1059	GATTGGGGAGCAATTTTT	TATGTGAGCCATAAAACTCGT	140	(TAAA)6
BM1060	ATCTCATTGTGTTCGTGACAT	ACAACTTCAACATTACGGAGA	136	(TCA)9
BM1061	AGGAGGGGGCTATATAAAAGT	TCAATGATGACAATGATGATG	140	(GTC)6
BM1062	CAACTATGATGTGCCTCCTAC	ATCATCATCATCATCCACTTC	157	(GGA)5
BM1063	CTGTTTCTTTTTGTTCATTGTG	ATGAAAAATTGATGGTGTCTC	147	(AGAT)5
BM1064	ATTAAATGGGATAAGGCACAG	CCCTTCTACTCGTTCTTCTTC	144	(AAG)7
BM1065	ATGAAGAAGGGCTGTAGAAGT	CTCCGTCTTCTTCTTCTTCTC	161	(AGG)4
BM1066	AGGAGGAGGAGGAGATAAATA	CTCCTGTCCTTCTTCTTCTTC	113	(AGA)5
BM1067	AAGGAGGAGGAGGAGATAAAT	TCTTCTTCGTCATATTCTTTCTT	137	(AGA)5
BM1068	CATGAACAACAACAACATGAA	TGTTCATGTACACCATCTCAC	143	(AAC)7
BM1069	ACAACAACAACAACAACAACA	GACATTCATATTGCCATTCAT	152	(AAC)4
BM1070	CATCATCATCATCATCATCTTC	CAAAAAGAATAGGAAGAAGGAA	157	(CTT)16
BM1071	TTTTGTTCTCCTATGCTAACCT	ATTACGCGACAAAGAAGAAG	137	(CTC)7
BM1072	AATTTGACAGTGGTCCTTGTA	TGTATAAAGGCGGTAGAATCA	156	(CTC)7
BM1073	TGTGACATCTTCTCCAAATTC	TTGTTGTTGAACTTGATGTTG	161	(CAA)6
BM1074	ACAACAACAACAACAACATCA	GTAGACCTTTCTGTTGTCGAA	146	(ACA)4
BM1075	CATTAATCTCCGGAATAGTCA	ACATTGCAGCTAAATGGTAAA	159	(ATA)6
BM1076	TTTTCTTCTCCGGATCAAT	GGAAGAAGAAGAAGAAGAGGA	144	(TCT)4
BM1077	AAGTCGCCAGACATACAACT	CATCCTCATCCTCTTTTCTTT	140	(GA)11
BM1078	ACGGTACACACCAATTACAAC	AGCCAATCCTCTTTAACTAGC	152	(AAT)8
BM1079	AATGAGGAGTGCACTTGATTA	TAATTGGCTTTATCCTGAACA	143	(TTA)9
BM1080	CAAAACTTTAGTTTCCCTTCA	GTCTCAATGGACACTTTTCAC	156	(AAT)6
BM1081	AAAGGAGAAAAATAAGAAGACAG	TTCTTATCACCTTCTTCTCTTCA	121	(AGT)4
BM1082	CCAACTGAACATACCTACCAA	ATATAAAAGCGAAATGGCACT	129	(AGTC)4
BM1083	CCGAATCTGTAATAATTTCGAC	ATTCCCTCAAGTTAAGAAACG	132	(TCT)6
BM1084	TGGGTAAGGCTTCAAATAATA	TACTTTGGTGGTTCTTTGAGA	144	(TTC)8
BM1085	AAACCGAGGTAGAAGAGTCAG	GACTTTCTTTTTAGGCGAATC	152	(AAG)6
BM1086	TTTGGTATGCGAAATTCTAAG	GTTTGTTGTGTCTCGAGTAGG	152	(ACAA)4
BM1087	AAGAGAGTGTGTGAGAGAGAGA	AAACGTTGCTGTATTGTAAGC	120	(GATT)5
BM1088	CTTCCAAGATAACATTTTTGC	CAAAATAGGTTTCGACCTGTA	100	(ATA)8
BM1089	CACTGTCAGGCTTTTGAGTAG	CCATGGACAGACTTTGAATAA	147	(ATA)6
BM1090	TTCTTCCTCTCCTTCTCATTT	AGAAGCGAGTGTGAAAAAGAT	149	(TTC)4
BM1091	GAGTTGATTACTGCCAAAGTC	CTTCAAGAAGGAAGCCACTAC	100	(ATG)9
BM1092	CAACTACAACCAAGACCACTC	ATGATGATGGCAAATCTGTAG	141	(TCA)5
BM1093	ACCATCACACTCATCATCATC	GTGAGGTTACAGATGGACTTG	161	(CAT)5
BM1094	AGTAGGTAGTTGCGAAGAGG	GTAGAGTAACCAACCGCTGTA	125	(ATG)6
BM1095	GATGTTGAGGTGTAAGAGTGC	AGCTTAGCAGTCCGTTTTATC	135	(ATG)4
BM1096	TCAGAAAAACATGGAGGTATG	AGTTGTGATTCATAATGACTGT	107	(ATA)7
BM1097	ACAACACTTTGTGTTTTATGAC	TGTCTCCAGTTTTATTTTTGC	144	(ATTG)7
BM1098	ATTCAGCTGTGAATAGAATCG	ACTCCACCCTAGTAAAAGCAT	145	(ATTG)3
BM1099	ATCTTCGCCACGTTATCTAAT	CCGACTATTGTATTGTTTGCT	200	(TATT)5
BM1100	CTTCTTCTTCTTTTCTTCTTCC	AGACAGAGGAAGACAGCCTAT	163	(TCT)6
BM1101	TTCTTCGTGATCATCATCTTC	ATTATGTAGAGGGGTCAAACC	157	(TCT)5
BM1102	TAACGCCTTCTTCAGAACATA	ATTTCAGTGTGGGGTTATTCT	142	(AAAC)3
BM1103	GATAGAAGTGGGAAGGAAAGA	ACTTCTTTACCAACAACACAA	145	(GAG)6
BM1104	ATGATGATCGACATGGTCA	TTGAGGCTTTTACTTTTCCTT	105	(ATG)9
BM1105	GGTCACTTGCATGGTAGAATA	TCATGACATTATGACAAGTCG	144	(ATT)6
BM1106	TCCACTCTTGCTGATTTATGT	CGAAAACGAAAGAGAGAAAA	167	(AATT)3
BM1107	GGCTGAAAAGAGTGAAAGAAT	TTCTTCTTCTCCTCCTTCGT	130	(GAA)4
BM1108	TTCTTCTTCTTCTTCCTCTTCTT	CTTTGAATATGGTCGAGTTTG	161	(CTT)4
BM1109	AAGAAAAGAAGGAGAAGGAGA	TGCAAAGGTTCCTCTTTTTAT	193	(AAG)5
BM1110	AGAAGAAGAAGACAGGAGAAAA	GCAAAGGTTCCTCTTTTTATT	165	(AAG)6
BM1111	AAGAAGGACAGGAGAAAAGAA	TTGATGCAAATAGAGGACAAT	151	(GAA)5
BM1112	AATAATTGAACCACTATCGATCT	CACAATGTTAAACTGCATGTC	211	(GTA)6
BM1113	TGCAACTCTAGGGGTAATGTA	TATTGAAAGGATGGTAGCAAA	144	(CGA)4
BM1114	TTTACGCTTAAATTGGCAGTA	GGAGTCAAGTCAATAGGACAA	215	(CTG)7
BM1115	AAGAGGAAGAAGAACCAGAAA	ATCAACATCTTCGAATCCTCT	148	(GAT)7
BM1116	TTTTGCTCTCTCCTTAATCCT	CGTTTGTTACAACACTTTGTG	137	(TCAA)7
BM1117	AGAATGGGTTGAAGTAGAAGC	AGAAGAACTCAATCATCATGC	150	(TTG)7
BM1118	ATCTTCGAAACAGTATCACCA	ACCAATAAAAGCCATACGAA	132	(ATA)6
BM1119	TCTGGTTTTCATTGCTCTCT	GACAACAACAAGAACTGGAAC	151	(TTG)6
BM1120	CAAAATTTGGGAATGGAATAG	GTAAGGCTAGGCATACACCAT	124	(ATAA)5
BM1121	TTCATCCTCTTCTTTTCTTCC	GCAATTTCACAAGAAGGAGA	165	(TCT)6
BM1122	CATTGCACAATATTAGAGTTGAA	TTCATTTGAGATTGAACACATAG	166	(CAG)7
BM1123	CCTAAAAAGCAGTCGTTAGGT	CGTTTTATGTCGCAACTCTTA	142	(TAT)6
BM1124	AATTCGCTTAGCGTACACAC	CAGCTCCATGTTGTATGAG	165	(CA)16
BM1125	GTGTCGGATCCTTATATTGTG	GATGAACATGTGTGTGTGTGT	149	(AC)11
BM1126	TACACACACACACACACACAC	TGATTTGTAATTTCCAGTGGT	143	(CA)13
BM1127	TGCTCTATTATGGATTGTGCT	CCAATTAAATCAACATGAAGG	146	(GT)10
BM1128	ATGAATAAACTCCTCTGGATG	TCTGCCCAAATACAAGAAATA	126	(ATT)9
BM1129	TTCCTCCCCATTCTTTATTAC	CACAATGAGGAGAGGTAGAAG	194	(CTT)7
BM1130	ACTGGTTCATTTTGCTGAATA	CCCAAAGAGGCTTTTATTACT	164	(ATT)6
BM1131	CCATTCCATTCTCTCTAGTCA	TTTGTACCACTATGGGTCTTG	156	(TTTA)5
BM1132	TGTTTGACAGAGTTTTTCGAT	CTTTTGTTCTGTTTCTTTCCA	182	(TATT)6
BM1133	GAATAAGAAGACGGTCAGGTT	CCATCATTTCTTTCACATCAC	170	(TGA)10
BM1134	GTCAAAAGAATGTTTGTCTGG	GGTCAGACACACTCACACAAT	138	(TGA)6
BM1135	GCTTTTAACACGCTCAGTTTA	TCAACAAGCCCAATAATAGAA	116	(TTA)7
BM1136	TTCAGCCACACCAATGTAT	TTAACGCTAGAACGTAAGTTGA	145	(AAAT)3
BM1137	TTTTTCCTCTTCTTCTTCTTCTT	TGATAACAAATCCAAAGCAA	150	(TCT)5
BM1138	AACAAGAACTGGAACAACAAG	TTGTTGTCATCATCATTCTCA	194	(AAC)4
BM1139	GATGATGACAACAACCAAAAC	GTTGTCACTGTTGTTCCAGTT	153	(AACAAT)3
BM1140	GTACTCAATCAATCAATCAATCA	GAAAACAGAAAGAAGAACACG	150	(TCA)7
BM1141	AGGAGGAGGAGGAGAAGAA	ATGGTAGTGAATGCATGGTAG	131	(GAG)4
BM1142	CCACTAACGACAGGAAAAGTT	AAGGTCGAACAGACCTAAAAT	149	(ATA)8
BM1143	CTGTTTTCTTTTTGTTTGCAC	GTGTGTGTGTGTGTGTGTGT	138	(GCAC)3
BM1144	CTATTTACGGTCCGGGTAG	TTCCTTCTTTCTTTTCTTCTTG	191	(GAA)5
BM1145	AGGAGAAGATGCAGACTTTTT	TATCCCCTATCTTTCCTTTCA	151	(AGA)6
BM1146	TCCCTATCTTTTCCTTTCATC	AGGAGAAGATGCAGACTTTTT	149	(TTC)7
BM1147	GCATGCAAAACACTTTAAATC	TGCCCATGTAGTGGTTGT	130	(CAG)5
BM1148	CACTCTAGCCTGTTAGTTTGG	GAAGAAGAAGAAGAAGAAGAAGA	151	(TTC)4
BM1149	AGGGATAGGGAGAAAGGTTAC	TCTTCTTCTTCTTCTTCTCTACC	132	(GAT)5
BM1150	CAGAAAGAAGAAGATGAGTGG	TCCTTCCAATTTCTTCTCAA	147	(AGA)7
BM1151	TAGGCTTCAGCTTAAACGAG	CTCTCTCTCTTCTTTCTCTCTCA	114	(AG)6
BM1152	TTAAGTCATTCCGTTAATTGG	GTGTGTGTGTGTGTGTGTGT	121	(ACA)7
BM1153	AATTCTCCTTCCATGAGTTTC	TGTTCTGTTTCTTTTCCACTC	167	(AAG)6
BM1154	GATATTCATCGATTCCGTGT	GAAGAAGAAGAAGAAGAAGAAGA	121	(ATC)16
BM1155	TCATCATCATCAACATCAACT	GACAGTCAGTTGCTGACAGAG	136	(TCT)6
BM1156	ATTTCCAGTGTTGCTTCTATG	GACAGGTTTGCTCAGTCTTTA	150	(ATA)8
BM1157	TCTCAGATCATTTGAACCTACA	TCTTCTTCTTCTCTTCCTCCT	168	(AAG)4
BM1158	CCACTAACGACAGGAAAAGTT	ATGCTGGAACACATAGTTGAG	218	(ATA)8
BM1159	CGTTTGTTACAACACTTTGTG	TTCCCAATCGAATGTATAAGA	166	(ATTG)6
BM1160	CTTTTGTTCTGTTTCTTTTGC	AAAGATTGAGGGATGATGAAG	131	(TTC)4
BM1161	GTGTTGCTTCTATGGTGTTTC	GACAGGTTTGCTCAGTCTTTA	133	(ATA)9
BM1162	TTCTTCTTCCTCTTCCTCTTC	ATGAAGTGAATGTCGGTGTAG	195	(TCT)9
BM1163	TCACTTCATCCACTATCGTTC	AGTAGGGTGAGAAACCAAAAG	151	(TCT)4
BM1164	GTATGGAGGGTTAAGTTAGGC	TCAATCAATCAATCAATCTCTC	173	(TC)12
BM1165	TCTGCTGAGTCATCATTAACC	GAAGAAGAAGAAGAAGAAGAAGA	110	(TTCCTT)4
BM1166	GGGAGAAAAATTTGAAGAGAG	TTTTGCTGTATTGTAAGCTATTG	158	(TGAT)7
BM1167	GTCTTCAACTTTAAGCCCAGT	GGCAAATCTGTAGATGAAGAA	165	(TCA)6
BM1168	TTCTGTTTCTTTTGTTAGAGACC	GAAGAAGAAGAAGAAGAAGAAGA	154	(TCT)6
BM1169	CGAATGATTACTCGATTTTTG	CTTTTGTTCTGTTTCTTTTGC	174	(AAG)6
BM1170	CAACTCAAAAACAAAAACCA	CTTCTTCTTCTCTTCCTCCTG	195	(AAG)4
BM1172	TTTTGCTGTATTGTAAGCTATTG	AAGGAAAAGAAGAAGATGGAA	141	(TCAA)5
BM1173	GATTTGCTGTCTAGTCGTATCA	CAACACAACGAACAATAACAA	150	(ATTT)3
BM1174	TCCGCAATGATGTAAGTAAAC	GCTTCAAAATTCAACTGAAGA	151	(CGA)4
BM1175	ACTTGTCAGTGAGTTGTCTCG	TAGACAAAAAGCTTGCATCTC	149	(GGTCGA)3
BM1176	TGCCTTTCAAGATTATTGTGT	TGCTGTTTACGTTTACTACATCA	160	(AC)6
BM1177	TCAATGTAGTTATCTGAAATACG	GACAAGATATTACCGCTGTTG	150	(TACA)3
BM1178	GAGTATGCCTTCTGTTCAGTG	CATCTTCGAGAGTGTAGGTTG	148	(TGC)4
BM1179	CAAATCGATTATTTCGTTCAG	CAAATCAAGAGGAAATAGCAA	171	(ATT)5
BM1180	AAAAGAAGCTGAAGAGGAAGT	TACTAAACCATCTTGCGATTC	151	(GAG)5
BM1181	GATGACGATTTGAGTGATGAT	CAACAACAAAGTACAGGCAAT	143	(CCTC)4
BM1182	CAGGCCTATCAAATTGTCTTA	TTAGATATCATCAGGGAATCG	150	(TTTA)3
BM1183	AGTGAGTGAGAAGAGGGAGAG	ATTTGATCCTAATCCTGATCC	145	(TCC)4
BM1184	CACCTACTCCATCAGAGACC	TCTATGTTCTCGCAATTATCC	150	(GAAA)3
BM1185	ACTGTTAATGTTGGCACTCC	TACGGATTCATCTCGAAAATA	171	(CTC)4
BM1186	GATAGAAGAAGAGCACCGATT	GTGATGCCTCTTGTGAAGAT	152	(TTC)4
BM1187	CACTGATGTGTCTCAAACAGC	TCATTCAACACTTCAACTCAA	155	(GTGA)3
BM1188	TGTGAGTGAGTGAATGAATGA	TCAACACTTATTTTCCACACAT	150	(TGAA)3
BM1189	AAGCCATAGTGATGTTGAATTA	TCATTCTTCTCAATTTGCAGT	181	(TGAA)3
BM1190	ATGGAGAGGAGAAAAATTGAG	AGCTGATGACGTTGTTATGAT	215	(AAAT)3
BM1191	CCACTATGGGAAAGAGAAAGT	CTTCTTTCCTGATTCTTCTCC	152	(AAG)4
BM1192	AAGAGAAAGTTGATCGAGGAC	AGAGAGCGATTTCTTCTTTTT	168	(AAG)4
BM1193	GCTACTAATGCCATTTTCAAG	CTCGCAATCATTACCATTATC	154	(AAAT)3
BM1194	TATGGATTCTATTGGATTGGA	AGCCTCAGGAATTAACATCTC	158	(GGAT)3
BM1195	CAGGATGTGGATGTTACAGAT	TCGAGTTAAACATGAACAACA	152	(TATT)3
BM1196	CTTGAAACTCATCCTGAGCTA	TTTCTTCGTGTAATCAGCAAT	159	(AGG)4
BM1197	TTCAATTTGAGCCGTATAGAT	CAAGAAACATCAATGCCTAAT	158	(TAT)5
BM1198	GTATCACCTGTACGCCAGAC	CATTGTCATCGAGATCATTTT	169	(GAT)5
BM1199	CAGGTCCACTCATTTCTCATA	ACTTCAGTGTGAAATTGGTCA	178	(TTTA)3
BM1200	TAGATTTCTCAATCCTGGTCA	ATTATTACATGTGGTGGAACG	154	(AAT)5
BM1201	AAAAAGCATGGTGTACAAGAA	GGTGATTTTTGCCAATTAGAT	152	(AAG)5
BM1202	CAGATCCACGAGTATTCTGAG	CATGAAGCGGTACAAAGATAG	133	(ACAA)3
BM1203	GCCATCTCTCATCCTCTTC	GGCTCAATCTATCTTCGATTT	153	(TCC)4
BM1204	ATTGTCTGTCCTAAACTGCAA	GTAATAATCGTTTTGTGCAT	149	(AT)9
BM1205	ATTCTCTATTAGCCCACCAAT	TTTCTACTCAACATTGGCACT	148	(TTTTA)3
BM1206	AATGAGAGCATGGAGGTAGAT	AAGACCTGGTTTCCACTAATC	152	(AAG)5
BM1207	AAGGATGACGATAAGGATGAT	GAATCAGCTTCAGCTTTGATA	143	(AAG)4
BM1208	CCGGTTTTTGAAGAACTCTAT	TTCTTCTTTTTGTTGCACTTC	152	(GTGC)3
BM1209	ACGACTGTTCGTTCGACTAC	GAGTTCGCTTATACAGACACG	160	(CAGTG)5
BM1210	GGTAGGCTGTGCTCTTAAATA	CAATGTTCAATTATCCCAAA	154	(AT)7
BM1211	CCCTAAAAATCTGAGGAAAGA	AAGGAAAAATACCTAGCCAAC	149	(TTTCA)5
BM1212	GTAATCATTTTGTAGCCGATG	ATCGCAATGCATTAAAAACT	147	(ATT)4
BM1213	CACAAGGTGTGAGTGATTTTT	CTTGTACCGTTTCAAGTTCAC	151	(TGAT)3
BM1214	CAATTTTCTCGCTGTAAAGAA	GAGAACGCTGCTAATGATAAA	153	(ATT)4
BM1215	TGCATGGTGTCACATACATTA	GTCACTTATGTGGATGGATTC	150	(TATC)3
BM1216	TGCACCTTAAAATAGGAATGA	TTAACCGCTCCAATATCACTA	149	(CATT)3
BM1217	CTTCAAATCGGTGTATCAAAC	AAATTATGAAGCTGTTGAAGG	131	(ATTG)3
BM1218	AATACGTTGTTTATGGTGGTG	AGTTGACAATTTCCTTCACAA	151	(AAT)4
BM1219	ACTGCAGATCAAGAACATCAT	GATATCTATTGCTGGCCTAAA	164	(CCGCAG)3
BM1220	CAAGTGGGAAGAGCTAGATG	GCTGGTGATCATTATGGAGT	156	(CT)8
BM1221	GAAGAAAGCAGGAAGAAGAAG	CTCCTGTTCTTTTCGTAACCT	156	(AGG)4
BM1222	AAGAAGAAGAGGAGAAACTGC	TTCCTCTTTACGTCGTTTGT	183	(AGA)4
BM1223	AAACGACGTAAAGAGGAAGAG	CGGTTCTTTTCGTAACCTATC	148	(AGG)4
BM1224	AAGGCTGAAAGAAGAGGAAG	CTCTTTACGTCGTTGGTCTT	158	(AGA)4
BM1225	GGGACAACCTCACCACTAA	GGTTGGTACTGAGAAGCAGT	166	(ACC)4
BM1226	GTTGCCCTTAGTTTTTGTCTC	GCCAATGCTACTAACGATGT	156	(ATTT)3
BM1227	TTCGTTCTACATTCTGAAAGG	CAAGAGAGAGACAGACAGGAA	170	(TATT)3
BM1228	ACAGAATGAGTCACCACAGAT	GAGGTGACTTGCTGTTGTATC	150	(CAG)5
BM1229	AAAAAGAAGAAGACTTCGATCA	AATCAAACTTCGTTCAATCAC	148	(AAG)5
BM1230	TGGCACGAATAAATTCCTTAT	CGATGCAACAATCACATAATA	145	(ATT)4
BM1231	TGATGATGAAGAAGAAGAGGA	TCTTGTTTTTCTTGGCTGTAG	155	(GAT)4
BM1232	AAAGTATTGAGTCAGCAGCAG	GTTGATGGCATTGTTGATCT	174	(CAG)4
BM1233	CTTTCACCAAGAATCTCAAAT	TTTAGCCATTTCGTATGTGAT	158	(AGA)6
BM1234	ACCGGTTAGTCAAGACAAGA	TATTTATGTGCCAAATCAAGG	155	(TTAT)3
BM1235	CCAAAGTACAATCTCCACCTA	ATCATCTTCGTCATCACTGTC	149	(GAT)10
BM1236	TCGACGAACTCGTTATGTATT	CAAGTTGGAAAGGCAGTTAG	131	(ATT)5
BM1237	AGCAACTGACCTCAGCTAGTA	AGGAGTCTGTGACATGTTTGT	150	(TGTCG)4
BM1238	GATGTCATGAAAGAAGCACTC	ATCTACCTCCATGCTCTCATT	150	(AAG)5
BM1239	TGCAAATGACATGTAAATGAG	CAATCGGATATTACGAGTTGA	187	(TAT)5
BM1240	GTTGTTGAATGTTCAGCTTTT	CAGCTTATACGGTCTTCATTT	164	(ATC)4
BM1241	GCGTGAGTGTGTAAGAATGTT	ATTTCAACACACCACATGATT	164	(AAG)4
BM1242	TTTATACCAAAGGAGCAATGA	AACCATAGTCACCTTTATAACCT	175	(ATT)4
BM1243	TGAAGAAGAATTCATTGAGGA	ATTATCTTCCTCCTCCACATC	163	(AGG)4
BM1244	CTACAGCCAAGAAAAACAAGA	CTCATCTTCTTCATCGTCATC	179	(ATG)4
BM1245	AACAGAGATGCTAAAAAGACG	CAAACTTTGCTTACGTTGGTA	149	(AGC)4
BM1246	GAAGGAAAGAAGGAGAAGAAG	CTTTTGGGCTCGAGACTT	153	(AAG)4
BM1247	GCACAAGATAAGGTTGTTGAT	ACTATCCACTTCCTCTTCCAC	150	(AGA)4
BM1248	GAGTTGCAAATGGAGTATGC	CCTCAGAAACCTTCTCATTCT	151	(AAG)4
BM1249	TGTTTCAACAGCAGAATCAA	ACTTGTGTTGGTGTTTCGTT	154	(CAA)4
BM1250	CATGCGCAGTAACTATTCTTC	TCTATCCTTGCATCACATACC	150	(TGG)4
BM1251	GCGAAGATATCATCAAATTCA	TCAGATCCTCTATCATCGAAA	154	(TGA)4
BM1252	GGAGGAAGTAGACAAGAAAGC	GGGTTGTATGAATAACTGATCC	149	(AGA)4
BM1253	GAAGAAGCCAAAGAGAAGAAG	TCCGATTCACTATCAGAAGAG	173	(AAG)4
BM1254	GCAAGAGTGAAAGAAAACGTA	GCTTCTTCATCATCCTTCTTT	139	(AAG)4
BM1255	CTAAGTGAGCCTGAAGAAGAA	ACTCCTCTTCGGTTTCTGAT	148	(GAA)4
BM1256	ATCATCAGATTGTTTGGCTTT	AGCCTTACATGTGAGACGAC	162	(GGA)4
BM1257	GACCGACTACCTGATGAAGAT	GTTCGTATGACTTCTCCAGTG	170	(CCT)4
BM1258	AAAGAACTTGAACTTGGAAGC	CCGAAAATTGAAAGTTAGAGG	151	(GT)6
BM1259	GTTGTGTTACATGTTGTGTCG	TTTGCTAGCACTTTGACTTGT	150	(ATAG)8
BM1260	CACAAAATTGTTGCTTGTCTT	CCTCAGATTTTTAGGGTGAAT	147	(TGAT)4
BM1261	GTTGTGTTACATGTTGTGTCG	AATTAATGGTGTCTCGCTTTT	152	(ATAG)4
BM1498	CGCAGTCTAAGAAGCTACAGT	TGCTTGAGCTAGAAGCTGAC	172	(GCA)4
BM1499	TTGTTGACAAAGAAACAACTTC	AGACCTATTTTGTGGTTTCCT	165	(TTG)4
BM1500	GTGCTTGTGAAGAACAATCAT	GTATAGCAGCGCAATAACATC	129	(GT)6
BM1501	TACAGCTGTCCATTCTACTCG	AGCTTGTGCTAGAAGCTGAC	133	(GCA)4
BM1502	AATGTCATCACTTCCAATGAC	GGTGAATACTGAAGCAGACCT	151	(AGC)5
BM1503	GCCTACTACGGAGGTTTCTAC	GACTGATTGGTATGACCTTGA	147	(ATC)4
BM1505	ATTACGGAGGCTTCTACAATG	TACTGCTGGACTGATTGGTAT	151	(TCA)4
BM1506	TGGACTTCTCACAAAAGAAGA	TCGTAGGTGTAGTCACGATCT	151	(AAG)4
BM1507	AGCAACGTTGAACAGCTC	GTTCTTGTTGTTGTTCCCTGT	136	(AGC)5
BM1510	GCCTATTACGGAGGTTTCTAC	GACTGATTGGTATGACCTTGA	150	(ATC)7
BM1513	TACAGGCTGTCCATTCTACTC	TAGGAGCTGGTGCTTGAG	144	(GCA)4
BM1514	TCATTTCCTGTATCCATGAGT	ATCAAACACACACACAAAACA	146	(AATA)5
BM1517	CGAAATTTGAGGTTAGGATTA	CTTCTAGCGGAAAACATAGTG	159	(TAAT)3
BM1518	AGAAAATGGAGAAGGAGAATG	CCTGTCGTTTACTTGTTGAAG	147	(AGA)17
BM1521	CGATAAAGCTTCAAGTCAAAA	CTGAAGGTTTGCTCAATGTAG	148	(GAATA)3
BM1522	ATTTCGTAGATTCGTCCTACC	GGATTATAATTGGCAGCTCTT	148	(GGCCAA)3
BM1524	CACTTCCAACGACTATGACAG	GTCACCATTGTTCTTGATGTC	163	(AGC)14
BM1525	TACAGCTGTCCATTCTACTCG	GGTAGGAGCTGGTGCTAGA	145	(GCA)4
BM1526	ACCTTTCTCATTCTACCATCC	GGAATTTCGCTTTGAGATACT	142	(ATC)4
BM1527	ACAGAGATCGCAGTTCAGTC	CAGTAGTATCCACTGCTGGAA	184	(GCA)4
BM1529	GCCAAAACAAAATGAACTGTA	TGAAATGATCACCTTACTGGA	134	(GTTT)3
BM1530	AAACTGTGGAGGAAACTGTG	TTGATGGTGGAGAATTTCTAA	152	(GGGGGC)3
BM1531	ATGAGCTATGGAAGCTATGGT	GCAGCATAATCGTATTCTGTA	161	(ATC)5
BM1532	GCGCCTCAATATAAATTACAC	CCCGAAGACTTCTGTTACTG	158	(AATA)4
BM1534	GAGTTCAAAACTTGATTGACG	AACAGCAGAAACAAGTCAAAA	170	(TTAT)3
BM1535	AGAATTCAAGTCAAGCATCAA	TCCTTAGGAGCATCAAAAGAG	135	(CCAA)3
BM1536	ATGAGCTATAGCAGAGGGAGT	CATTCTTCTCTTCCTTCCTTC	160	(GAT)4
BM1537	CATGTCGAATCTGACAGAACT	TGACTTTTCAAATGTTAAGCTG	144	(TCA)4
BM1539	ATGTTAAGAGAACCGTTGGAT	ATTCCTAGCATTTTCCACATT	165	(GGA)4
BM1543	GCTTCTTGAGGAATTGAAGTT	CAAGTAGCAAATGCTTTTATTG	154	(TG)8
BM1544	CATGAGCTATGGAAGTTATGG	TGCTGTTGGTATTCTGAAGAT	159	(ATC)4
BM1545	GTTGACATGGTTGTATCTGCT	ATGAAGCGTAAAAGGAAAAAG	158	(TCT)4
BM1546	ATATCAAGTATTGCCGGTGTA	AGTTATGGGCTGTACCTGTTT	156	(TTAT)3
BM1547	CAGTCTACAAGAAACTGTGTCG	ATAGCACAATTCTTGGCTCTA	153	(AAG)4
BM1549	GTGACTCGCTGTTGAGTAGAG	ATGCTGACAGTGGAAGTGAT	154	(GAC)4
BM1550	ACATTACTGTTGCCTTCAATC	GAGTAGTCTGCCCTGTTGTTA	154	(CAA)4
BM1551	CACCACAAGAACAGTCGTATC	TAGTTGTTGTTGGTGTTGTTG	149	(ACA)7
BM1552	CGTTTGAGAGCAGCAGTT	TCTCTCATAACTTTCCGTTCA	155	(AGA)5
BM1554	TCAGAATCAAATGATGAGGAC	AGCTTTTTCTTTTTGGCTTT	146	(GAG)4
BM1555	ATTCCTATAGTGATGGGTGCT	TAGGAGTTGAAGAGGTTGTCA	149	(ATTC)3
BM1556	CTTCCAACAATCATCATCATC	TACTGCTGGACTGATTGGTAT	129	(TCA)4
BM1557	CATGAGCTATGGAAGTTATGG	GTTGCTGTTGGTATTCTGAAG	161	(ATC)4
BM1560	AATAAGCAAGCAATACCAACC	TATTCGTCATCTTCATCCTGT	156	(CAG)7
BM1563	AGCAACAACAGTAATAGTGACG	CTGCTCCATAGATTTCGTAGA	165	(CAAC)3
BM1564	TAGCTACTGCAGTTCCTTCTC	CAGTAGTATCCACCAAAACCA	201	(GCA)4
BM1565	GACATCATCCAACAACTTCAC	TATGGCAGTGATAGGGAAAC	150	(CCCT)3
BM1566	ACACGGTACTTTGAAGATGAG	TTTCTGAACATTTTGGTTAGG	155	(CTCA)3
BM1568	AGATTGTTGATCATGTTTTGG	CTGGTGGATTGATAAAAAGAA	151	(ATT)7
BM1572	AATCTTCAACCAATTCCAAAC	TGGTAACTCTATGATGTCCAAA	154	(TTCA)3
BM1573	CACAACTACCGAGTTCATCAC	GGTGACCACTGTTGTACTGAT	166	(CAC)4
BM1579	TAGCTACTGCAGTTCCTTCTC	GTAGTATCCACTGCTGAACCA	201	(GCA)4
BM1580	GCATCAAGAGACAAATAAACG	TTGGCGAAATAAACATTCTT	150	(AAT)4
BM1582	GTCATCACTTCCAACGACTAT	GTCACCATTGTTCTTGATGTC	150	(AGC)8
BM1583	AGAGAGAACCAGAAGAACCAG	GAGCTCTCCAGTTTTTCCTAT	153	(AAG)4
BM1584	AAGAGGAAATTGTATGACTTCG	AAATAAAGGAAGAGACGCTGT	163	(TTTA)3
BM1589	GGAGAAGAACAATGGAGAAGT	CCTCTACCACATTCACACACT	161	(GAA)4
BM1591	TACTACGGAGGTTTCCACAAT	TACTGCTGGACTGATTGGTAT	152	(TCA)4
BM1592	CCAATCACTGGCAAGTACA	ACGTATTCATAGTCGAAATGC	102	(ACA)4
BM1593	TAGCTACTGCAGTTCCTTCTC	CTCAGTAGTATCCCCCAAAAC	203	(GCA)4
BM1595	CTAGCGACCTCTATGGTGATT	CCATGTTGTGGTGGTGAT	138	(ACC)4
BM1596	TACTGTAGCTTCGTCGACCT	ACAGCTAACTAGTCCAAAACG	146	(GCGGC)3
BM1597	CATACGCCAGATCACAAAG	TACTGCTGGACTGATTGGTAT	103	(TCA)4
BM1600	CGGCAGTTGAAGTTATATTGA	CTGAACGAGATACGTATTTGAA	150	(AT)8
BM1604	AAACTGTGGAGGAAACTGTG	GGTGATCCAGTTTAACAAACA	129	(GGGGGC)3
BM1605	TTCACAATACAATTCCTCAAGA	TTTTTCCTCTCCTACTCATCC	279	(GAA)4
BM1606	TTGGCAAATAGATGATTCAA	TTTGCCAAAACAACATTACA	149	(TTGAT)3
BM1607	TTTGTATTACAGTGCCTATCCT	TCCAACATACATAACAGAGGAA	186	(TTA)4
BM1608	CAGACATCTTCTCCTCAACAG	ATGACATGCTTTGTGATCTG	185	(ATC)8
BM1610	ACTTCCAACGACTATGACAGA	GTTCTTGACGTCCTGGATAA	144	(AGC)7
BM1611	CACCACAAGAACAGTCGTATC	TGGTTGTTGTTGTTGTTGTAG	294	(ACA)4
BM1613	ACAAGTTTTTGCCAGTGATT	GCAGGTGTAAAATATGAGCTG	147	(AATA)3
BM1614	GCCTACTACGGAGGTTTCTAC	TATGACCTTCAGGCAGAGTAA	138	(ATC)4
BM1615	ACTTCCAACGACTATGACAGA	GAATACTGAAGCAGACATGGT	163	(AGC)8
BM1616	CTGGAATTCAAACATTGTCAT	AGTTTTTACAATAGGGCACAA	145	(AAT)4
BM1617	ATCAGCAATTTCTTGTCTTGA	GAAATCTGCAATGATTTCAAC	160	(CCAG)3
