# Supplementary material for: Genome-Wide Mapping of Virulence in Brown Planthopper Identifies Loci That Break Down Host Plant Resistance
Source: PLoS One. 2014 Jun 9;9(6):e98911. doi: 10.1371/journal.pone.0098911 (PMC4049697; doi:10.1371/journal.pone.0098911)
Supplement: Table S3 — The primers for the SRAP markers used in this study. (XLSX) [file pone.0098911.s003.xlsx]

## Sheet: Sheet1
Table S3 The primers for the SRAP markers used in this study.
primer name	Forward primer (5' to 3')	primer name	Reverse primer (5' to 3')
Me1	TGAGTCCAAACCGGAAA	Em1	GACTGCGTACGAATTAAT
Me2	TGAGTCCAAACCGGAAT	Em2	GACTGCGTACGAATTAAC
Me3	TGAGTCCAAACCGGAAC	Em3	GACTGCGTACGAATTATG
Me4	TGAGTCCAAACCGGAAG	Em4	GACTGCGTACGAATTACG
Me5	TGAGTCCAAACCGGATA	Em5	GACTGCGTACGAATTAGC
Me6	TGAGTCCAAACCGGACA	Em6	GACTGCGTACGAATTTAG
Me7	TGAGTCCAAACCGGACT	Em7	GACTGCGTACGAATTTGA
Me8	TGAGTCCAAACCGGACC	Em8	GACTGCGTACGAATTTGC
Me9	TGAGTCCAAACCGGACG	Em9	GACTGCGTACGAATTTCA
Me10	TGAGTCCAAACCGGAGA	Em10	GACTGCGTACGAATTTCG
Me11	TGAGTCCAAACCGGAGC	Em11	GACTGCGTACGAATTCAA
Me12	TGAGTCCAAACCGGAGG	Em12	GACTGCGTACGAATTCAT
Me13	TGAGTCCAAACCGGTAG	Em13	GACTGCGTACGAATTCAC
Me14	TGAGTCCAAACCGGTTG	Em14	GACTGCGTACGAATTCAG
Me15	TGAGTCCAAACCGGTCA	Em15	GACTGCGTACGAATTCTA
Me16	TGAGTCCAAACCGGTGT	Em16	GACTGCGTACGAATTCTT
Me17	TGAGTCCAAACCGGTGC	Em17	GACTGCGTACGAATTCTC
Me18	TGAGTCCAAACCGGCAG	Em18	GACTGCGTACGAATTCTG
Me19	TGAGTCCAAACCGGCTA	Em19	GACTGCGTACGAATTCCA
Me20	TGAGTCCAAACCGGGAC	Em20	GACTGCGTACGAATTCGA
Me21	TGAGTCCAAACCGGGTA	Em21	GACTGCGTACGAATTCGG
Me22	TGAGTCCAAACCGGGGT	Em22	GACTGCGTACGAATTGAT
Me23	TGAGTCCTTTCCGGTAA	Em23	GACTGCGTACGAATTGAC
Me24	TGAGTCCTTTCCGGTCC	Em24	GACTGCGTACGAATTGAG
Me25	TGAGTCCTTTCCGGTGC	Em25	GACTGCGTACGAATTGTC
		Em26	GACTGCGTACGAATTGCA
		Em27	GACTGCGTACGAATTGCC
		Em30	GACTGCGTACGAATTCTGC
		Em31	GACTGCGTACCAATTCGAC
		Em32	GACTGCGTACCAATTCGAG
		Em33	GACTGCGTACCAATTCGCA
		Em34	GACTGCGTACCAATTCGCC
		Em35	GACTGCGTACCAATTCTCA
		Em36	GACTGCGTACCAATTCTCC
