# Supplementary material for: Genome-Wide Mapping of Virulence in Brown Planthopper Identifies Loci That Break Down Host Plant Resistance
Source: PLoS One. 2014 Jun 9;9(6):e98911. doi: 10.1371/journal.pone.0098911 (PMC4049697; doi:10.1371/journal.pone.0098911)
Supplement: Table S5 — Summary of the molecular linkage map constructed for the F1(TM) population. (XLSX) [file pone.0098911.s005.xlsx]

## Sheet: Sheet1
Table S5 Summary of the molecular linkage map constructed for the F1(TM) population.
Linkage group	Total length (cM)	No. of loci	No. of marker	Average distance (cM)	Estimate of genome size (cM)	Genome coverage (%)	Largest interval (cM)	EST-SSR	genomic SSR
F1(TM)-1	45.238	13	13	3.47985	52.7777	85.7143	10.919	11	2
F1(TM)-2	71.271	22	22	3.23959	78.0587	91.3043	13.249	15	7
F1(TM)-3	79.763	23	24	3.46796	86.6989	92	10.255	21	3
F1(TM)-4	63.79	20	20	3.1895	70.5047	90.4762	12.568	17	3
F1(TM)-5	53.444	20	21	2.6722	58.7884	90.9091	9.305	13	8
F1(TM)-6	66.296	19	19	3.48926	73.6622	90	27.978	17	2
F1(TM)-7	45.758	17	17	2.69165	51.4778	88.8889	17.182	13	4
F1(TM)-8	68.553	24	25	2.85637	74.2657	92.3077	23.995	16	9
F1(TM)-9	83.501	30	30	2.78337	89.2597	93.5484	27.841	25	5
F1(TM)-10	56.891	14	14	4.06364	65.6435	86.6667	14.248	12	2
F1(TM)-11	64.225	28	29	2.29375	68.8125	93.3333	19.322	25	4
F1(TM)-12	37.027	16	16	2.31419	41.9639	88.2353	10.768	16	0
F1(TM)-13	76.84	20	20	3.842	84.9284	90.4762	17.473	16	4
F1(TM)-14	35.27	21	21	1.67952	38.797	90.9091	11.018	16	5
Total	847.867	287	291	2.95424	935.639	90.619		233	58
