# Supplementary material for: Genome-Wide Mapping of Virulence in Brown Planthopper Identifies Loci That Break Down Host Plant Resistance
Source: PLoS One. 2014 Jun 9;9(6):e98911. doi: 10.1371/journal.pone.0098911 (PMC4049697; doi:10.1371/journal.pone.0098911)
Supplement: Table S6 — Summary of the molecular linkage map constructed for the F1(MT) population. (XLSX) [file pone.0098911.s006.xlsx]

## Sheet: Sheet1
Table S6 Summary of the molecular linkage map constructed for the F1(MT) population.
Linkage group	Total length (cM)	No. of loci	No. of marker	Average distance (cM)	Estimate of genome size (cM)	Genome coverage (%)	Largest interval (cM)	EST-SSR	genomic SSR
F1(MT)-1	36.633	10	10	3.6633	44.7737	81.8182	10.655	8	2
F1(MT)-2a	32.756	11	13	2.97782	38.2153	85.7143	13.754	10	3
F1(MT)-2b	58.066	8	8	7.25825	74.6563	77.7778	23.221	1	7
F1(MT)-3	52.664	19	23	2.77179	57.4516	91.6667	10.992	20	3
F1(MT)-4	78.236	30	31	2.60787	83.4517	93.75	12.781	24	7
F1(MT)-5	22.278	15	18	1.4852	24.8989	89.4737	5.877	17	1
F1(MT)-6	80.286	21	23	3.82314	87.5847	91.6667	16.678	19	4
F1(MT)-7	59.995	21	22	2.8569	65.7088	91.3043	21.849	12	10
F1(MT)-8	74.153	15	15	4.94353	84.7463	87.5	19.388	13	2
F1(MT)-9	49.39	16	19	3.08688	54.8778	90	19.081	19	0
F1(MT)-10	43.622	14	17	3.11586	49.0748	88.8889	15.979	12	5
F1(MT)-11	50.671	14	20	3.61936	56.0048	90.4762	14.19	17	3
F1(MT)-12	35.734	9	9	3.97044	44.6675	80	24.133	9	0
F1(MT)-13	69.723	16	18	4.35769	77.9257	89.4737	15.03	14	4
F1(MT)-14	31.222	11	13	2.83836	36.4257	85.7143	11.41	8	5
F1(MT)-X	22.356	12	14	1.863	25.7954	86.6667	12.588	14	0
Total	797.785	242	273	3.29663	906.259	88.0306		217	56
