# Supplementary material for: Genome-Wide Mapping of Virulence in Brown Planthopper Identifies Loci That Break Down Host Plant Resistance
Source: PLoS One. 2014 Jun 9;9(6):e98911. doi: 10.1371/journal.pone.0098911 (PMC4049697; doi:10.1371/journal.pone.0098911)
Supplement: Table S7 — Location of markers on the consensus map. (XLSX) [file pone.0098911.s007.xlsx]

## Sheet: Sheet1
Table S7 Location of markers on the consensus map.
	Chr1			Chr2			Chr3			Chr4			Chr5			Chr6			Chr7			Chr8			Chr9			Chr10			Chr11			Chr12			Chr13			Chr14			ChrX
Nr	Locus	Position		Locus	Position		Locus	Position		Locus	Position		Locus	Position		Locus	Position		Locus	Position		Locus	Position		Locus	Position		Locus	Position		Locus	Position		Locus	Position		Locus	Position		Locus	Position		Locus	Position
1	NLGS2272	0		BM1320	0		NLGS2504	0		NLGS2799	0		NLGS92	0		SRAP208	0		NLGS515	0		BM1305	0		BM421	0		BM611	0		NLGS1565	0		NLGS1254	0		BM1277	0		BM713	0		NLGS3014	0
2	SRAP801-5	9.578		BM1322	11.557		BM1423	3.646		BM1586	3.884		BM570	4.317		NLGS255	2.85		NLGS1955	3.748		NLGS2525	2.317		NLGS889	0.766		SRAP921	3.087		NLGS2614	4.304		SRAP2207-3	10.512		NLGS339	0.736		BM797	4.539		BM1136	2.647
3	SRAP3002	17.263		SRAP503-2	19.762		BM1035	8.89		BM1471	4.054		SRAP1219-2	10.813		NLGS2	5.186		NLES8	7.961		NLGS618	4.895		BM1433	1.5		BM522	5.494		BM3	10.809		SRAP912-1	13.669		BM683	1.026		BM660	5.727		BM1507	4.964
4	BM854	17.95		NLGS309	23.012		BM948	9.322		BM1295	9.959		BM1217	19.323		NLGS268	6.467		BM49	8.354		BM621	8.017		NLGS2074	1.991		NLGS2167	6.273		SRAP421-1	15.561		BM358	15.649		BM1053	2.117		BM811	6.42		BM1502	7.227
5	NLGS2113	23.96		NLGS1857	23.996		BM398	14.235		BM1098	10.893		SRAP801-1	20.079		NLGS110	6.89		BM1616	12.096		NLGS630	8.271		NLGS1650	2.519		SRAP617-1	13.747		BM974	16.735		SRAP910-4	15.915		SRAP1316	3.349		BM888	7.502		BM1138	7.259
6	SRAP319-2	26.58		BM1323	25.095		BM1490	15.591		BM1369	11.659		BM1309	20.805		BM493	14.971		SRAP317-1	15.466		NLGS9	8.533		NLGS930	2.709		BM935	17.764		SRAP3215	17.127		SRAP1401	16.352		BM1052	4.128		BM896	12.686		BM13	7.736
7	BM262	30.617		NLGS2060	30.114		BM728	15.941		BM695	14.545		SRAP901-1	21.972		SRAP710	15.046		BM1368	16.703		BM815	8.95		BM1606	7.974		BM783	22.044		NLGS2552	18.264		BM1543	17.466		SRAP604-3	4.897		SRAP2313	15.818		BM500	7.942
8	SRAP1615-1	36.93		BM893	32.942		BM968	18.299		SRAP323-2	15.736		SRAP1324-2	23.448		SRAP2420	19.383		SRAP519	17.956		NLGS2556	9.131		NLES28	8.869		SRAP3213-1	26.3		SRAP2207-1	19.439		SRAP514	18.905		BM15	5.287		NLGS641	18.348		BM1582	8.408
9	SRAP1509-2	37.976		SRAP1222-1	34.438		NLGS1405	18.399		NLGS1361	18.937		BM212	23.697		NLGS827	20.87		BM146	18.39		BM962	9.348		SRAP3108-2	9.691		BM531	26.788		SRAP206-5	20.29		NLGS143	19.406		NLGS40	7.405		SRAP604-4	18.798		BM1524	8.41
10	NLGS1876	40.582		SRAP105-2	35.489		NLGS1825	20.308		NLGS1979	20.324		BM514	24.863		SRAP1311-2	22.023		SRAP610-1	21.083		NLGS2289	9.52		SRAP2519-1	14.266		SRAP211	28.395		BM324	22.186		BM1216	19.813		NLGS1423	8.835		SRAP2203-4	19.437		BM1610	8.477
11	SRAP1417-1	41.164		BM1326	36.365		BM877	21.651		NLGS2104	20.358		NLGS1492	25.265		BM1023	22.033		BM1456	21.301		BM1308	9.9		BM906	14.736		SRAP703-2	29.562		NLGS107	22.399		SRAP1815	20.144		BM1476	14.356		BM790	19.472		BM1615	8.481
12	BM609	42.505		SRAP2102	37.707		SRAP503-1	23.041		SRAP314-2	20.801		NLGS2690	26.145		BM1008	22.473		BM1283	22.612		NLGS2120	10.138		BM633	16.039		BM649	30.074		SRAP421-3	23.586		NLGS39	20.831		BM545	15.048		NLGS72	20.192		BM1215	8.846
13	BM135	43.85		BM814	38.816		BM268	24.198		NLGS2975	20.899		SRAP2203-1	28.113		BM961	23.907		SRAP1608-3	23.277		NLGS2905	10.142		SRAP2105-2	18.254		BM567	30.955		SRAP1914-1	23.705		NLGS2996	21.167		NLGS2828	15.531		NLGS73	21.042		BM499	8.846
14	NLGS1963	44.796		BM1327	39.057		BM1241	26.093		NLGS1915	21.525		SRAP403-3	30.496		NLGS16	24.641		BM375	23.58		NLGS1526	10.142		BM925	19.069		BM1170	31.611		SRAP402-1	24.909		SRAP2203-5	22.455		BM757	16.023		NLGS271	21.711		NLGS808	9.848
15	SRAP2024-2	45.058		NLGS96	39.261		BM590	29.549		BM510	24.224		NLGS1654	32.239		NLGS1016	25.381		SRAP1311-1	23.878		BM1306	10.142		SRAP1210	20.512		NLGS2735	32.303		BM1409	25.253		SRAP910-3	22.866		BM1415	16.656		BM904	23.178		BM653	9.875
16	NLGS324	45.418		SRAP206-1	40.744		BM848	31.569		BM1519	24.608		NLGS859	33.596		NLGS2489	26.163		BM596	25.617		NLGS1247	10.142		NLGS1909	21.338		SRAP2716	32.713		BM530	26.532		BM778	23.377		BM403	17.865		BM1373	23.63		NLGS399	9.875
17	BM1091	45.936		NLGS1476	42.149		SRAP203	32.752		BM1514	24.65		NLGS13	34.059		SRAP2108	27.001		BM1444	25.647		NLGS2659	10.178		SRAP3421	22.6		NLGS548	33.292		BM75	27.573		BM368	23.591		SRAP618-3	18.255		NLGS629	23.691		NLGS50	9.889
18	NLGS2985	46.384		NLGS761	42.296		BM556	34.504		BM252	26.642		NLGS175	34.673		SRAP419-2	27.83		SRAP206-4	28.563		NLGS1613	10.468		SRAP723-1	24.082		BM1473	33.542		NLGS932	28.241		BM990	23.777		BM68	19.171		NLGS2492	23.909		NLGS82	10.138
19	SRAP617-2	46.481		BM707	43.628		BM941	34.958		SRAP109-1	27.08		BM370	34.738		NLGS1037	28.048		BM72	28.668		NLGS744	10.627		BM690	24.355		BM1005	34.088		BM1236	28.309		NLGS1935	23.777		BM737	19.338		NLGS556	24.009		NLGS825	10.459
20	BM282	47.084		NLGS151	43.641		NLGS41	36.056		SRAP1416-2	27.763		BM1461	34.828		SRAP323-1	29.323		BM599	28.684		NLGS7	10.765		BM350	25		BM578	34.352		BM1220	28.607		NLGS2043	24.576		BM568	21.103		BM903	24.011		BM652	10.623
21	NLGS2367	47.375		SRAP1324-1	44.013		BM591	36.605		SRAP2203-2	29.876		NLGS1559	35.235		BM1019	29.344		SRAP402-2	28.867		BM1351	10.818		NLGS159	25.436		SRAP2215-2	34.513		BM4	29.129		NLGS1410	24.647		SRAP618-1	22.089		NLGS2284	24.195		BM650	10.716
22	NLGS925	47.574		BM782	44.022		BM1111	37.923		NLES30	30.142		NLGS1477	35.41		SRAP403-1	29.416		NLGS775	28.915		NLGS2596	11.181		SRAP1021	26.324		BM228	34.714		NLGS1871	29.272		NLES35	24.676		BM796	22.729		SRAP3605-1	24.544		NLGS67	11.033
23	NLGS1959	47.574		BM8	44.565		BM716	38.852		NLGS1855	30.838		NLGS799	35.69		NLGS839	29.893		NLGS2708	29.133		BM1443	11.742		NLGS2282	26.324		NLGS2512	34.929		SRAP611	29.5		BM64	24.736		NLES18	23.151		BM406	24.602		BM503	11.564
24	BM1193	47.622		BM709	45.711		BM98	39.412		BM594	31.396		BM795	35.816		NLGS78	30.39		BM393	29.41		BM1375	11.904		SRAP3108-3	26.324		BM423	35.024		BM491	30.356		BM279	24.914		BM696	23.629		SRAP604-2	24.786		BM246	12.254
25	NLGS2623	47.624		BM379	46.514		BM67	43.171		NLGS2991	31.718		NLGS1837	35.932		NLGS802	30.492		NLGS528	29.973		BM1350	12.216		NLGS6	27.488		NLGS136	35.069		BM101	30.844		SRAP910-2	25.01		NLGS56	23.774		BM1262	24.828		BM784	12.499
26	NLGS816	47.675		BM542	46.746		SRAP206-3	46.112		BM432	32.149		BM1167	36.091		NLGS957	30.679		NLGS1781	30.119		BM140	12.605		NLGS1035	27.869		NLGS969	35.135		SRAP314-3	31.111		SRAP1606-2	25.351		SRAP1222-2	24.662		BM1360	24.871		BM913	12.523
27	NLGS703	47.899		BM1344	46.794		BM910	47.451		BM775	33.108		NLGS602	36.266		NLGS1644	30.87		NLGS1753	30.539		BM1037	12.897		SRAP1304	28.209		NLGS2580	35.313		BM1089	31.207		SRAP2215-3	25.596		SRAP1311-3	25		BM536	25.194		BM1566	13.132
28	BM791	48.7		BM1343	47.347		NLGS2472	47.719		BM718	33.143		BM1093	36.426		NLGS954	31.051		BM1312	30.757		BM722	13.495		BM85	28.231		NLGS2601	35.326		BM835	31.625		BM376	26.243		BM175	25.357		NLGS1446	25.475		NLGS225	13.809
29	NLGS1773	49.298		SRAP1319-1	47.479		NLGS134	48.991		NLGS755	33.522		BM622	36.525		BM1500	31.296		NLGS749	30.923		BM1352	13.759		NLGS124	28.447		NLGS1375	35.328		BM579	31.91		BM48	26.682		NLGS711	25.512		BM711	25.799		BM1158	25.992
30	NLGS523	49.298		BM1004	48.312		NLGS2518	49.792		BM773	34.39		BM1092	36.525		NLGS3148	31.425		NLGS3046	31.09		NLGS1707	13.81		BM902	28.82		NLGS938	35.328		BM834	32.231		BM685	27.039		NLGS3105	25.912		BM292	25.894
31	SRAP2024-1	49.66		SRAP801-3	48.568		NLGS135	50.737		BM771	35.661		BM1002	36.576		BM395	31.633		BM732	31.241		BM963	14.05		BM759	29.282		NLGS620	35.337		BM917	32.284		BM1617	27.169		BM1537	25.916		BM513	26.094
32	SRAP113-1	50.465		BM1187	48.926		BM843	51.722		NLGS1063	35.895		BM789	36.639		NLGS2605	31.983		BM1185	31.716		BM171	14.704		NLGS1297	29.469		NLGS1867	35.608		BM582	32.627		BM1179	27.197		BM698	25.916		BM1435	26.202
33	NLGS1469	50.695		NLGS3034	49.324		BM844	52.957		BM777	36.111		NLGS286	37.196		BM817	32.272		NLGS1396	31.828		BM1525	15.403		NLGS137	29.826		BM644	35.64		BM712	33.264		SRAP703-1	27.287		BM697	26.189		NLGS1627	26.485
34	NLES33	50.879		BM440	49.809		BM1146	53.874		BM1521	36.838		BM658	37.544		SRAP1004-1	33.292		BM526	32.087		BM1436	16.145		BM973	29.928		NLGS1299	36.213		NLGS2182	33.648		BM754	27.715		SRAP113-3	26.304		BM1287	26.549
35	BM680	51.166		NLGS746	50.276		BM1489	55.708		NLGS2001	37.071		NLGS1878	38.555		SRAP1417-4	33.534		NLGS291	32.2		NLGS2379	17.403		NLES15	29.95		BM1483	36.843		BM298	33.712		BM688	27.966		SRAP109-2	26.729		SRAP2210-2	27.48
36	BM45	52.863		BM1449	50.921		BM988	59.722		BM380	37.582		BM661	38.636		BM489	33.659		NLGS60	32.264		BM105	17.617		BM689	30.057		NLGS1312	37.265		BM761	33.976		SRAP2207-4	28.343		BM674	26.902		NLGS168	28.096
37	BM1163	53.703		NLES24	51.041		NLES2	60.365		NLGS328	38.241		BM662	38.764		SRAP314-1	33.92		NLGS62	32.443		BM679	20.105		BM749	30.254		SRAP210	37.56		NLGS347	34.262		BM1124	29.534		SRAP701-2	27.158		SRAP206-2	28.651
38	BM1359	55.101		NLGS206	51.537		BM543	60.728		BM774	38.759		NLGS2128	38.97		BM1486	35.355		BM1118	32.612		BM199	20.934		SRAP818	30.353		SRAP701-4	39.182		BM1258	34.292		SRAP912-2	29.885		SRAP3315	27.537		SRAP319-1	29.681
39	NLGS751	56.368		NLGS1467	52.844		BM1145	63.039		BM776	38.881		BM593	38.977		SRAP723-2	35.729		NLGS1808	32.723		BM1417	21.87		NLGS1603	30.577		SRAP1921	39.408		BM364	34.292		NLGS1420	30.492		SRAP3213-2	27.848		BM952	30.682
40	BM126	57.252		BM627	53.529		BM858	72.171		BM1259	40.27		NLGS142	39.413		BM234	35.994		BM616	32.934		BM678	22.955		BM63	30.742		BM290	40.678		BM769	34.518		BM684	31.331		NLGS1360	28.931		BM957	31.997
41	BM1112	57.613		BM714	54.731		BM706	75.228		BM1338	40.661		BM745	39.898		BM1418	36.248		BM1094	33.009		BM321	23.886		NLGS2021	30.747		SRAP2203-3	42.944		NLGS2171	34.71		SRAP1509-1	31.484		BM1269	28.986		NLGS541	37.694
42	NLGS120	61.694		BM546	55.182		NLGS1945	77.249		SRAP2215-1	40.836		NLGS323	40.425		BM1115	37.033		BM1225	33.14		NLGS81	24.067		NLGS835	30.747		NLGS617	42.997		BM1329	34.966		SRAP3015	33.406		BM1448	29.198		NLGS1731	44.772
43	BM1437	62.257		NLGS1804	55.709		NLGS1527	78.449		SRAP1416-1	41.729		BM1058	40.678		SRAP2210-1	37.142		BM1242	33.357		BM758	24.077		NLGS2159	30.858		BM435	45.282		BM539	35.419		SRAP801-6	34.059		NLGS1428	29.499		SRAP105-1	45.05
44	SRAP2019-3	62.995		NLGS2952	56.261		BM1006	80.029		BM1335	43.482		NLGS1487	40.751		BM648	37.372		BM618	33.375		BM76	25.945		BM20	31.029		BM1405	54.658		BM1075	35.655		BM504	34.792		SRAP801-7	30.269
45	BM872	63.165		BM1445	57.375		NLGS1688	81.324		BM969	43.675		SRAP1413	41.271		SRAP1004-2	37.483		BM110	33.473		BM810	26.536		NLGS182	31.214		NLGS2965	58.053		BM1088	35.705		SRAP2207-2	35.335		SRAP103-2	30.293
46	NLGS1506	64.653		BM1457	58.611		NLGS971	83.864		BM747	44.033		BM592	41.547		BM726	37.713		NLGS1496	33.473		BM477	26.892		BM1117	31.318		BM577	58.857		SRAP1416-3	36.03		BM953	36.185		BM327	31.623
47	NLGS245	67.902		NLGS423	58.678					BM339	44.149		BM980	41.853		BM65	38.085		NLGS256	33.68		NLGS2386	26.973		BM194	31.341					BM1263	36.347		NLES6	37.462		SRAP113-2	32.364
48	BM930	74.394		NLGS1969	59.321					NLGS693	44.829		NLGS155	42.136		BM1213	38.664		SRAP1309	33.836		BM1237	27.172		BM5	31.37					SRAP701-1	36.385		NLGS1759	37.622		NLGS2821	34.573
49	NLGS1084	81.249		SRAP3108-1	60.535					BM708	45.424		BM764	43.065		BM846	38.811		NLGS264	33.852		BM1134	29.151		NLGS873	31.447					BM1175	36.499		NLGS21	40.283		BM1453	36.306
50	NLGS1722	87.538		NLGS1466	60.901					BM766	45.703		BM427	44.19		BM818	38.984		BM392	33.882		SRAP3624	29.996		BM38	31.6					SRAP701-3	36.693		NLGS2976	41.228		SRAP104	36.581
51				BM1060	62.5					NLGS1680	46.03		NLGS1640	44.257		BM1392	39.637		BM642	34.447		NLGS1494	31.29		BM122	31.733					SRAP422	36.914		NLGS2856	42.842		SRAP102	38.769
52				NLGS872	64.293					NLGS3040	46.176		BM44	44.99		BM1209	40.193		BM1357	34.689		NLGS1002	32.263		BM686	31.854					NLGS1807	37.214		BM390	47.564		SRAP3218	42.581
53				SRAP2019-2	65.735					BM507	46.266		BM37	45.666		BM986	41.041		SRAP3316	35.152		NLGS603	32.766		BM1003	32.197					BM918	37.37		BM574	52.889		BM1472	44.553
54				SRAP423	66.256					BM767	46.276		NLGS1993	46.172		BM1440	41.856		SRAP511	35.588		NLGS1703	34.717		NLES49	32.677					SRAP1104-1	37.496					BM402	45.153
55				BM1127	66.926					BM1446	46.717		SRAP1608-1	47.409		SRAP510-1	43.732		BM460	36.163		NLGS2173	40.903		BM1296	32.694					BM1104	37.697					BM836	47.267
56				NLGS901	68.468					SRAP2519-3	47.32		BM559	47.465		SRAP317-2	45.001		BM1149	36.799		NLGS3026	43.966		BM942	33.027					BM178	38.01					BM950	51.695
57				BM1025	73.429					BM1416	47.697		BM560	48.22		BM374	45.04		BM1526	36.877		NLGS1633	46.867		SRAP510-3	33.418					NLGS194	38.169
58				BM341	75.256					NLGS3044	48.284		BM558	49.437		SRAP103-1	45.488		BM1197	37.85		BM1377	49.264		BM1317	33.576					SRAP1606-3	38.608
59				SRAP1914-2	76.653					BM768	50.06		NLGS1702	50.494		SRAP522	47.668		BM1487	38.176		BM1527	50.376		NLGS2140	34.091					BM1462	38.819
60				SRAP724	86.181					BM1299	51.075		NLGS1788	51.429		SRAP1916-2	47.918		BM334	38.703		SRAP2105-3	50.532		NLGS57	34.836					SRAP910-1	38.991
61										SRAP901-2	51.773		BM557	56.24		NLGS1696	49.315		NLGS895	39.802		NLGS1617	61.444		NLGS36	35.513					SRAP1906	39.688
62										BM746	51.965		NLGS2015	57.148		SRAP801-2	50.83		NLGS929	40.368					NLGS86	36.682					SRAP1606-1	40.08
63										SRAP319-3	52.488		SRAP3304	65.468		NLGS1248	51.935		BM78	41.772					BM922	36.809					BM389	40.488
64										SRAP618-2	52.768		SRAP3506	70.139		BM1422	54.188		BM1195	43.921					BM979	37.028					SRAP421-2	40.825
65										BM860	53.211					NLGS241	54.649		SRAP1417-2	45.051					SRAP1104-2	37.512					BM347	41.257
66										BM861	54.303					NLGS2079	54.759		BM693	45.885					NLGS83	38.537					BM117	41.61
67										NLGS2829	55.618					SRAP1125-1	58.428		BM788	45.983					NLGS2416	40.022					SRAP610-2	41.913
68										BM1447	65.977					BM537	60.011		NLGS1740	46.654					BM1552	40.376					SRAP816-1	42.248
69										NLGS277	66.734					BM1589	69.382		SRAP1125-2	48.212					NLGS615	40.567					SRAP1615-2	43.038
70										BM200	77.834								BM6	53.977					BM23	40.575					SRAP801-4	44.767
71																			SRAP508	56.83					BM615	42.651					BM1412	45.22
72																			BM595	62.137					BM614	43.052					SRAP2519-2	46.327
73																			NLGS1646	62.943					SRAP703-3	43.916					SRAP715	47.286
74																			BM459	64.296					BM22	45.26					BM770	49.149
75																			NLGS719	64.921					SRAP2105-1	46.365					BM36	49.657
76																			NLGS909	67.258					SRAP2606	50.958					NLGS249	50.222
77																									BM1468	55.851					BM949	51.755
78																									BM1464	59.041					SRAP1608-2	52.417
79																									NLGS1824	60.442					NLGS42	53.768
80																									BM182	60.504					BM29	54.41
81																															NLGS1027	55.793
82																															NLGS1440	56.966
83																															BM894	57.939
